1 **Next generation cytogenetics: genome-imaging enables comprehensive**  
2 **structural variant detection for 100 constitutional chromosomal**  
3 **aberrations in 85 samples**

4

5 Tuomo Mantere,<sup>1,2,3,11</sup> Kornelia Neveling,<sup>1,4,11</sup> Céline Pebrel-Richard,<sup>5</sup> Marion Benoist,<sup>6</sup> Guillaume  
6 van der Zande,<sup>1</sup> Ellen Kater-Baats,<sup>1</sup> Imane Baatout,<sup>6</sup> Ronald van Beek,<sup>1</sup> Tony Yammine,<sup>7</sup> Michiel  
7 Oorsprong,<sup>1</sup> Daniel Olde-Weghuis,<sup>1</sup> Wed Majdali,<sup>6</sup> Susan Vermeulen,<sup>1</sup> Marc Pauper,<sup>1</sup> Aziza  
8 Lebbar,<sup>6</sup> Marian Stevens-Kroef,<sup>1</sup> Damien Sanlaville,<sup>8</sup> Dominique Smeets,<sup>1</sup> Jean Michel Dupont,<sup>6,9</sup>  
9 Alexander Hoischen,<sup>1,2,10,11</sup> Caroline Schluth-Bolard,<sup>8,11</sup> Laïla El Khattabi<sup>6,9,11</sup>

10

11 <sup>1</sup>Department of Human Genetics, Radboud University Medical Center, Nijmegen, The  
12 Netherlands,

13 <sup>2</sup>Radboud Institute of Medical Life Sciences, Radboud University Medical Center, Nijmegen, The  
14 Netherlands,

15 <sup>3</sup>Laboratory of Cancer Genetics and Tumor Biology, Cancer and Translational Medicine Research  
16 Unit and Biocenter Oulu, University of Oulu, Oulu, Finland

17 <sup>4</sup>Radboud Institute of Health Sciences, Radboud University Medical Center, Nijmegen, The  
18 Netherlands,

19 <sup>5</sup>Department of Cytogenetics, University hospital of Clermont-Ferrand, France,

20 <sup>6</sup>Department of Medical Genetics, Cochin Hospital, APHP.Centre, University of Paris, Paris,  
21 France,

22 <sup>7</sup>Institut Neuromyogène, CNRS UMR 5310, INSERM U1217, Lyon 1 University, Lyon, France; Unit  
23 of Medical Genetics, Saint-Joseph university, Beyrouth, Lebanon,

24 <sup>8</sup>Department of Genetics, Hospices Civils de Lyon, Bron, France, Institut Neuromyogène, CNRS  
25 UMR 5310, INSERM U1217, Lyon 1 university, Lyon, France,

26 <sup>9</sup>Cochin Institute, INSERM U1016, Paris, France,

27 <sup>10</sup>Department of Internal Medicine and Radboud Center for Infectious Diseases (RCI), Radboud

28 University Medical Center, Nijmegen, The Netherlands,

29 <sup>11</sup>These authors contributed equally to this work

30

### 31 **Corresponding Authors**

32 Laïla El Khattabi, PharmD PhD

33 Department of Genomic Medicine

34 Cochin Hospital, APHP.centre - University of Paris

35 75014 Paris, France

36 Email: [laila.el-khattabi@aphp.fr](mailto:laila.el-khattabi@aphp.fr)

37 AND

38 Alexander Hoischen, PhD

39 Department of Human Genetics & Department of Internal Medicine

40 Radboud university medical center

41 6500HB Nijmegen, The Netherlands

42 Email: [alexander.hoischen@radboudumc.nl](mailto:alexander.hoischen@radboudumc.nl)

43

#### 44 **Abstract**

45 Chromosomal aberrations and structural variations are a major cause of human genetic diseases.  
46 Their detection in clinical routine still relies on standard cytogenetics, karyotyping and CNV-  
47 microarrays, in spite of the low resolution of the first one and the inability to detect neither  
48 balanced SVs nor to provide the genomic localization or the orientation of duplicated segments,  
49 of the latter. We here investigated the clinical utility of high resolution optical mapping by  
50 genome imaging for patients carrying known chromosomal aberrations in a context of  
51 constitutional conditions.

52 For 85 samples, ultra-high molecular weight gDNA was isolated either from blood or cultured  
53 cells. After labeling, DNA was processed and imaged on the Saphyr instrument (Bionano  
54 Genomics). A *de novo* genome assembly was performed followed by SV and CNV calling and  
55 annotation. Results were compared to known aberrations from standard-of-care tests  
56 (karyotype, FISH and/or CNV-microarray).

57 In total, we analyzed 100 chromosomal aberrations including 7 aneuploidies, 35 translocations, 6  
58 inversions, 2 insertions, 39 copy number variations (20 deletions and 19 duplications), 6  
59 isochromosomes, 1 ring chromosome and 4 complex rearrangements. High resolution optical  
60 mapping reached 100% concordance compared to standard assays for all aberrations with non-  
61 centromeric breakpoints.

62 Our study demonstrates the ability of high resolution optical mapping to detect almost all types  
63 of chromosomal aberrations within the spectrum of karyotype, FISH and CNV-microarray. These  
64 results highlight its potential to replace these techniques, and provide a cost-effective and easy-  
65 to-use technique that would allow for comprehensive detection of chromosomal aberrations.

## 66 Introduction

67 Structural variants (SV) play an important role in human diversity and diseases. The emergence  
68 of cytogenetic tools, starting with karyotyping followed by fluorescence *in situ* hybridization  
69 (FISH) and CNV-microarrays, allowed for their detection and thereby significantly contributed to  
70 the discovery of disease causing genes.<sup>1-3</sup> However, these tools show significant limitations as  
71 karyotyping has a very low resolution, estimated at 5-10 Mb on average. Additionally, CNV-  
72 microarrays are not able to detect mosaicism lower than 5-20% or balanced chromosomal  
73 aberrations, and do not provide information on the location of the structural variation, e.g.  
74 mapping of insertions is impossible.

75 Despite their drawbacks, karyotyping and CNV-microarrays still represent major tools in the  
76 routine genetic investigation of constitutional and somatic diseases, since chromosomal  
77 aberrations are major causes of e.g. reproductive disorders, recurrent miscarriages, congenital  
78 malformations or (neuro-)developmental disorders. Karyotyping is thereby indicated for diseases  
79 where numerical and structural balanced aberrations are highly represented, such as in  
80 reproductive disorders where (sex)chromosomal aneuploidies and large structural aberration  
81 including balanced rearrangements are frequently present.<sup>4-7</sup> CNV-microarray is recommended as  
82 first-tier test for developmental disorders (DD) with or without multiple congenital anomalies  
83 (MCA),<sup>8</sup> as it enables the diagnosis of sub-chromosomal copy number variations (CNV) including  
84 clinically relevant microdeletions/microduplications.<sup>1; 2; 9</sup> In DD/MCA, the diagnostic rate rose  
85 from less than 5% with karyotyping<sup>10; 11</sup> to 15 to 20% with CNV-microarray leading to the  
86 replacement of the former analysis by the later as a first-tier test.<sup>8; 12</sup>

87 The recent breakthrough in sequencing technologies raised great interest in complementing or  
88 replacing cytogenetic tools for an all-in-one genetic test allowing for the detection of both  
89 nucleotide variants and structural variants.<sup>13-15</sup> Moreover, short read sequencing became

90 reasonably inexpensive and is versatile in terms of protocols (gene panel, whole exome  
91 sequencing (WES) and whole genome sequencing (WGS)). Yet, the detection of structural  
92 variants remains challenging because of (i) the relatively limited read length and (ii) the repetitive  
93 nature of sequences at some structural variation breakpoints. Although many improvements  
94 regarding technical aspects and data analysis pipelines have been achieved, genome sequencing  
95 is still not able to comprehensively and cost-effectively detect balanced structural anomalies,  
96 impeding its wide implementation in clinical cytogenetic laboratories. Moreover, the most  
97 comprehensive analysis of SVs in WGS data requires the use of multiple tools, as established e.g.  
98 by the 1000 genomes project SV consortium.<sup>16</sup> Hence, a real-time analysis with fast turnaround  
99 time is not yet feasible for each and every laboratory. It is expected that long-read whole  
100 genome sequencing (LR-WGS) will dramatically improve the ability to identify SVs in individual  
101 genomes,<sup>17</sup> and examples have shown this utility for individual research cases.<sup>18; 19</sup> However, the  
102 routine use of long-read sequencing as a diagnostic tool requires several improvements.

103 To this end, a tool complementary to sequencing that may truly replace standard cytogenetics  
104 may offer great additional value. Optical mapping by genome imaging consists of imaging very  
105 long linear single DNA molecules (median size >250 kb) that have been labeled at specific sites.  
106 Since its first description,<sup>20</sup> this formerly tedious technique has been updated by Bionano  
107 Genomics. They combined microfluidics, high-resolution microscopy and automated image  
108 analysis to allow for high-throughput whole genome imaging and its *de novo* assembly.<sup>21; 22</sup>  
109 Historically, such maps have been used as a scaffold to guide the assembly of NGS contigs to  
110 build reference genomes of several plant and animal species.<sup>23-25</sup> More recently, methods  
111 dedicated to the detection of SVs in humans have been developed. Data analysis thereby  
112 includes two distinct pipelines: a CNV pipeline that allows for the detection of large unbalanced  
113 aberrations based on normalized molecule coverage, and an SV pipeline that compares the  
114 labeling patterns between the constructed genome maps of the studied sample and a given

115 reference. The latter allows for the genome-wide detection of SVs as small as few hundred base  
116 pairs, including insertions, deletions, duplications as well as inversions and translocations.

117 Optical mapping using Bionano<sup>®</sup> recently proved to allow for efficient detection of a wide range  
118 of chromosomal anomalies in leukemia.<sup>26</sup> It has also been used to detect germline SVs in  
119 individual research cases<sup>27; 28</sup> or individuals from the 1000 genomes consortium<sup>16</sup> and to unravel  
120 population specific SVs.<sup>29</sup>

121 The aim of the current study was to benchmark Bionano Genomics' optical mapping technology  
122 against standard-of-care cytogenetic tools (karyotype, FISH and/or CNV-microarray). To do so,  
123 we analyzed a wide range of simple and challenging chromosomal aberrations, which had been  
124 previously characterized by standard approaches, in samples from patients with a broad range of  
125 clinical indications.

## 126 **Subjects and methods**

### 127 *Patient selection and sample collection*

128 This multicenter study involved a total of 85 samples from four genetic academic centers from  
129 the Netherlands (Radboud University Medical Center, RUMC) and France (Cochin hospital in  
130 Paris, Hospices Civils in Lyon and the university hospital of Clermont-Ferrand). Patients were  
131 referred to one of the inclusion centers for developmental or reproductive diseases.  
132 Recommended chromosomal investigations were performed according to the indications.  
133 Karyotyping was performed in case of reproductive disorders or family history of balanced  
134 chromosomal anomaly. CNV-microarray, and karyotyping for some samples, was performed in  
135 case of developmental disorders. In some cases, additional investigations including fluorescence  
136 *in situ* hybridization (FISH) were performed to characterize an identified anomaly.

137 Cases for which (i) a chromosomal anomaly was identified by karyotyping, CNV-microarray or  
138 FISH, and (ii) for which there was enough residual blood (EDTA or heparin) or cultured cells  
139 available after routine testing, were included. Samples were anonymized or informed consent is  
140 available, respectively. Blood samples for high molecular weight DNA extraction were stored at -  
141 20°C for a maximum of one month and at -80°C for longer term storage. In addition, several  
142 cases with known aberrations had material other than blood available as a residual material from  
143 routine testing. This included 8 amniotic fluid cell lines, 4 chorionic villi cell lines and 8  
144 lymphoblastoid cell lines, which were all generated from primary cultures according to standard  
145 diagnostic procedures.

146

#### 147 *Karyotyping*

148 Karyotyping was performed according to previously described standard protocols.<sup>30</sup>  
149 Chromosomal abnormalities were described according to the International System for Human  
150 Cytogenetic Nomenclature (ISCN, 2016).

151

#### 152 *Fluorescence in situ hybridization*

153 Fluorescence *in situ* hybridization (FISH) was performed on standard chromosome slides  
154 according to the manufacturer's instructions (Vysis, Abbott, USA), or using isolated BAC-clones as  
155 FISH-probes following standard procedures.

156

#### 157 *CNV-microarray*

158 CNV-microarray was performed using the Agilent SurePrint G3 ISCA v2 CGH 8x60K or SurePrint  
159 G3 Human CGH Microarray 4x180K (Agilent Technologies, Santa Clara, CA, USA), or the  
160 Affymetrix Cytoscan™ HD Array (Thermo Fisher Scientific, Waltham, USA). Genome coordinates  
161 were provided according to hg19/GRCh37 human reference genome.

162

163 *Ultra-high molecular weight DNA isolation, DNA labeling and data collection for optical mapping*

164 For each patient, ultra-high molecular weight (UHMW) DNA was isolated from 400  $\mu$ L of whole  
165 peripheral blood (EDTA or Heparin) or 1-1.5 million cultured cells (lymphoblastoid cells, amnion  
166 cells or chorionic villi cells), using the SP Blood & Cell Culture DNA Isolation Kit and according to  
167 manufacturers' instructions (Bionano Genomics®, San Diego, CA, USA). Briefly, cells were treated  
168 with LBB lysis buffer to release genomic DNA (gDNA) which was bound to a nanobind disk,  
169 washed and eluted in the provided elution buffer.

170 UHMW DNA molecules were labeled using the DLS (Direct Label and Stain) DNA Labeling Kit  
171 (Bionano Genomics®, San Diego, CA, USA). Direct Label Enzyme (DLE-1) and DL-green  
172 fluorophores were used to label 750 ng of gDNA. After a wash-out of the DL-Green fluorophores  
173 excess, DNA backbone was counterstained overnight before quantitation and visualization on a  
174 Saphyr® instrument.

175 Labeled UHMW gDNA was loaded on a Saphyr chip® for linearization and imaging on the Saphyr  
176 instrument (Bionano Genomics, San Diego USA) (Supplementary Figure 1).

177 *De novo assembly and structural variant calling*

178 The *de novo* assembly and Variant Annotation Pipeline were executed with Bionano Solve  
179 software v3.4 or v.3.5. Results were analyzed through two distinct pipelines: a CNV pipeline that  
180 allows for the detection of large unbalanced aberrations based on normalized molecule  
181 coverage, and an SV pipeline that compares the labeling patterns between the constructed  
182 sample genome maps and a reference genome map. Reporting and direct visualization of  
183 structural variants were performed using Bionano Access software v1.4.3 or v.1.5.1. The  
184 following filtering thresholds were applied: confidence values for insertion/deletion=0,  
185 inversion=0.01, duplications= -1, translocation=0 and CNV=0.99. SV calls were compared to an



186 optical mapping dataset of 204 human control samples (provided by Bionano Genomics) to filter  
187 out common SVs and potential artifacts (both technical and reference-genome related)  
188 (Supplementary Figure 1).

#### 189 *Data analysis and comparisons*

190 All optical mapping results were analyzed genome-wide (Supplementary Table 1) for all samples  
191 irrespective of the patient's chromosomal status. We subsequently compared SVs and CNVs  
192 detected by optical mapping to the ones previously identified by standard-of-care techniques  
193 (karyotype and/or CNV-microarray).

194

## 195 **Results**

#### 196 *Population description*

197 All 85 samples included in this study were previously analyzed by karyotyping, FISH and/or CNV-  
198 microarray according to the reason for referral and the respective international  
199 recommendations (Figure 1A and B, Supplementary Table 1). Reasons for referral included  
200 developmental delay including autism spectrum disorders or intellectual disability, associated or  
201 not with congenital malformations (49 patients, 57.6%), reproductive disorders (15 patients,  
202 17.6%), familial history of chromosomal aberration (12 patients, 14.1%), and abnormal prenatal  
203 test results (9 patients, 10.6%). These samples exhibited a total of 100 chromosomal aberrations  
204 with 11 different types of aberrations from the previous standard diagnostics tests, summarized  
205 in Figure 1C. Additionally, nine known aberrations in this cohort were beyond the scope of this  
206 study due to breakpoints in the (peri-)centromeric regions of any chromosome or p-arm of  
207 acrocentric chromosomes, and were therefore excluded from further analyses.

208

209 *Results of Optical Mapping with Bionano Genome Imaging*

210 Bionano genome imaging generated on average 655 Gbp of data per sample (853 Gbp for  
211 samples processed in Nijmegen, aiming at ~200X genome coverage, and 463 Gbp for samples  
212 processed in France, aiming at ≥80X genome coverage per sample, respectively). The average  
213 N50 molecule length (> 150 Kbp) was 267 Kbp and label density was 15.1 labels/100 Kbp. This  
214 resulted in an average map rate of 76.8% and an effective coverage of 152x (192x for Radboud  
215 samples, 114x for French samples) (Supplementary Table 2).

216

217 Structural variant calling identified on average 5,758 (+/- 344) SVs per sample, of which the vast  
218 majority corresponded to insertions and deletions (with an average of 4,127 (+/- 239) and 1,549  
219 (+/- 108) respectively). Filtering out events which were present in a database comprising of 204  
220 population control samples resulted in an average of 80 (+/-65) rare SVs per sample, of which 41  
221 (+/- 28) were overlapping with genes (Figure 2, Supplementary Table 3). Besides SV detection,  
222 CNV detection was performed using a separate coverage-depth based algorithm that is included  
223 in the *de novo* assembly and variant calling pipeline.<sup>31; 32</sup> This analysis resulted in an average of 1  
224 gain and 10 losses per sample without applying any size threshold cut-offs (Supplementary Figure  
225 2). Of note, CNV calls are often segmented into multiple calls, hence the true number of CNVs is  
226 expected to be lower.

227

228 *Detection of diagnostically reported aberrations with genome imaging*

229 All diagnostically reported aberrations in our study cohort were detected correctly either by the  
230 SV or the CNV calling, with several aberrations being identified by both algorithms, reaching a  
231 100% concordance for optical mapping with the previous diagnostic test results (Supplementary  
232 Table 1). For five samples however, filter settings needed to be adapted in order to detect the

233 expected aberrations (see Supplementary Table 1). Adaptation included setting the confidence  
234 value for CNVs to 0 (3 samples) and turning off the SV DLE-1 mask filter (2 samples).

235 The 100 identified aberrations included 7 aneuploidies, 20 deletions and 19 duplications, 35  
236 translocations, 6 inversions, 2 insertions, 6 isochromosomes and 1 ring chromosome (Figure 1C).

237 In addition, four of our patients showed complex chromosomal rearrangements, defined as cases  
238 where aberrations involve three or more chromosomes or when at least four SVs are detected  
239 on the same chromosome. For graphical representation of different types of chromosomal  
240 aberrations see Figures 3 and 4.

241

#### 242 *Aneuploidies, partial aneuploidies and large CNVs*

243 Our study cohort included 7 full aneuploidy samples, including 3x XXY, 2x monosomy X, 1x  
244 trisomy 14 and 1x trisomy 21 (the two latter ones were detected in prenatal samples and were  
245 mediated by Robertsonian translocations). In addition, 4 mosaic monosomy X samples were  
246 included (Supplementary Table 1). All aneuploidies of the autosomes were called correctly with  
247 the used algorithms, whereas the aneuploidies of the sex chromosomes had to be manually  
248 inferred from the visualized data of the CNV plot (Figure 3). This manual inference is no longer  
249 required with the recent Bionano Solve v3.5. In addition to whole chromosome aneuploidies, five  
250 large CNVs ranging in size between 6.6 and 14 Mb, and 7 large aberrations corresponding to  
251 derivative chromosomes from unbalanced translocations detected by karyotyping, were included  
252 and detected correctly.

253

#### 254 *Isochromosome*

255 Six of our samples contained isochromosomes. Four of those were iso-dicentric Y-chromosomes,  
256 one sample contained an isodicentric chromosome 15, and another had an isodicentric  
257 chromosome X. The four isodicentric Y-chromosomes all showed a similar genome map pattern

258 (Figure 5). Whereas all four have normal coverage at the p-arm and a small part of the q-arm  
259 (until q11.221), there is no coverage at q11.222 to q11.23 and at the end of q12. The largest part  
260 of q12 had no coverage in none of the samples (including controls), as this part of the  
261 chromosome represents a gap in the reference genome (hg19, N-base gap). Interestingly,  
262 whereas samples 27, 57, and 79 have a nearly identical coverage pattern, only sample 55 shows a  
263 slightly different breakpoint, with a part of q11.222 still being covered. While the CNV or  
264 coverage pattern undoubtedly allows to decide about the presence of isochromosomes in all  
265 samples, it should be noted that centromeres itself cannot be detected, hence the distinction  
266 between dicentric vs. monocentric status may remain uncertain in some cases. Of note, the  
267 isochromosomes of chromosomes 15 and X presents are remarkable: For chromosome 15, the  
268 fractional copy numbers of the affected regions differed, and were called as 3 and 4. The  
269 isodicentric chromosome X was present in low mosaic state (see Supplementary Figure 3).

270

#### 271 *Ring chromosome*

272 One of the samples analyzed contained a mosaic ring chromosome X, as previously detected by  
273 karyotyping (Figure 6). The karyotype reported was 45,X[14]/46,X,r(X)(p11.21;q21.1)[21]. The  
274 patient presented with growth retardation and development delay. Following genome imaging,  
275 an intrachromosomal translocation on chromosome X was detected, connecting positions chrX:  
276 g.57,009,891 (p11.21) and chrX:g.78,599,384 (q21.1), confirming and refining the positions  
277 previously detected by karyotyping. The fractional copy number of 1.6 for this region, compared  
278 to 1.0 for the rest of this chromosome confirmed the mosaic state of this ring chromosome.

279

#### 280 *Translocations and inversions*

281 Thirty-five of the investigated samples carried previously identified balanced (n=28) and  
282 unbalanced (n=7) translocations, which were all detected by genome imaging. As expected,  
283 unbalanced translocations were detectable by both structural variant calling and CNV calling,  
284 whereas balanced translocations and inversions were only detected by SV calling (Figure 4B, C).  
285 Traditionally, balanced translocations can be detected via karyotyping but not via CNV-  
286 microarray. Genome imaging is able to refine translocation breakpoints for such cases.  
287 Accordingly, several balanced translocations and inversions were shown to likely disrupt protein-  
288 coding genes, including the well described *SETBP1* (MIM: 611060), *KANSL1* (MIM: 612452),  
289 *DYRK1A* (MIM: 600855), and *PIGU* (MIM: 608528) genes, with the latter two being disrupted by  
290 the same translocation (Figure 7). The breakpoints for *KANSL1* (sample 49) had previously been  
291 validated using FISH and whole-genome sequencing (WGS),<sup>33</sup> whereas the others are newly  
292 uncovered and still need to be confirmed. In all cases, the patient's phenotype matches the  
293 expected phenotype for the dominant diseases associated with the respective genes. Detection  
294 of breakpoints with optical mapping is much more accurate than karyotyping. For the few  
295 breakpoints for which WGS data were available for comparison,<sup>33</sup> the breakpoint accuracy was  
296 within five kb (Supplementary Figure 4).

297

#### 298 *Microdeletions and -duplication*

299 In addition to large chromosomal aberrations (aneuploidies, large CNVs and translocations), our  
300 cohort included 34 microdeletion/-duplications (<5 Mb). These microdeletion/duplications  
301 ranged in size from 34 Kbp (sample 84) to 4.2 Mbp (sample 44), and included some of the well-  
302 known microdeletion/duplication syndromes such as DiGeorge syndrome (22q11.2 deletion  
303 syndrome, OMIM: 188400), Williams-Beuren syndrome (deletion 7q11.23, OMIM: 194050),  
304 Charcot-Marie-Tooth syndrome type 1A (CMT1A, duplication 17p12, OMIM: 118220) and 1q21.1  
305 susceptibility locus for Thrombocytopenia-Absent Radius (TAR) syndrome (OMIM: 274000).  
306 Although the presence of segmental duplications (SegDups) for several of these

307 microdeletions/duplications often leads to breaking of the genome maps, all  
308 microdeletions/duplications were correctly called by either the SV or CNV algorithms or both,  
309 although most events were called by the CNV tool. SeqDups are often mediating recurrent CNVs,  
310 for example the 22q11.2 microdeletion-causing DiGeorge syndrome (Figure 8). Depending on  
311 size and structure of these SeqDups, the SVs were occasionally disrupted, or falsely filtered out  
312 due to high population frequencies of partially overlapping SVs (Supplementary Table 1). We  
313 expect that the analysis of individual molecules of sizes up to 2Mb shall allow full assembly maps  
314 even for those regions but additional software improvements may be required.

315

316

### 317 *Complex cases*

318 Finally, four of the samples included in this study presented with complex rearrangements (28,  
319 52, 55, 66), four of which are samples of patients with developmental delay and/or intellectual  
320 disability (Supplementary Table 1). For example, karyotype of Sample 28 (Figure 9) showed a  
321 translocation  $t(3;6)(q1?2;p2?2)$ , a derivative chromosome 4 ( $der(4)(:p1?2->q1?2:)$ ) and a  
322 derivative chromosome 5 ( $der(5)(4pter->4p1?2::4q1?2->4q34.2::5p14.2->5qter)$ ) in different  
323 clones. CNV-microarray showed losses on 4q34 ( $4q34.2q34.3(176587929\_190957474)x1$  dn) and  
324 5p15 ( $5p15.33p14.2(113577\_24449849)x1$  dn). Following optical mapping, the translocation  
325  $t(3;6)(q1?2;p2?2)$  was identified as  $t(3;6)(q13.12;p24.3)$ . In addition, a translocation  
326  $t(4;5)(q34.2;p14.2)$ , a loss of 4q34.2q34.3 and a loss of 5p15.33p14.2 were detected, concordant  
327 with previous results. In the same sample, genome imaging also revealed putative additional  
328 translocations  $t(3;4)(q13.11;q12)$ ,  $t(3;4)(q13.11;p11)$   $t(4;6)(q12;p22.3)$  and an inversion  
329  $inv(13)(q31.2;q33.3)$  (Figure 9).

330

331 Another sample (66) showed a 3-way translocation  $t(3,13,5)(p11.1;p12;p14)$  after karyotyping  
332 and four losses on chromosome 3  
333 ( $3p14.1(65238298\_68667113) \times 1, 3p13(70127345\_73724765) \times 1$   
334  $, 3p12.1(83784489\_85467284) \times 1, 3q11.2(97180779\_97270083) \times 1$ ) following CNV-microarray  
335 (Figure 10). Optical mapping confirmed these aberrations, but unraveled additional complex  
336 rearrangements on chromosome 3, leading to the identification of a chromoanagenesis. For all  
337 residual samples with complex rearrangements, see Supplementary Table 1 and Supplementary  
338 Figures 5 and 6.

339

340 Taken together, optical mapping allowed the correct unravelling of complex karyotypes, which  
341 previously required the combination of karyotyping, FISH and CNV-microarrays, by combining the  
342 detection of translocations and imbalances (CNVs, gains and loss of genetic material) including  
343 balanced and unbalanced events in one assay and at an unprecedented resolution.

344

345

## 346 Discussion

347 Chromosomal aberrations and SVs are frequently involved in many genetic diseases including  
348 developmental disorders, congenital malformations, intellectual deficiency, reproductive  
349 disorders as well as cancer. Hence, their accurate detection is critical to achieving a complete  
350 genetic investigation but limitations of the current standard-of-care genetic analyses  
351 (karyotyping, FISH, CNV-microarray and NGS) preclude any comprehensive characterization  
352 without combining multiple approaches.<sup>16, 34</sup> Indeed, to date, not a single technology offers a full  
353 resolution of chromosomal aberrations in all samples. The traditional karyotyping is still  
354 performed as the first-tier test in case of reproductive disorders in spite of its poor diagnostic  
355 rate (overall less than 10%), likely due to its very low resolution. Moreover, its quality is

356 unpredictable since it varies between samples and laboratories, it depends on the availability of  
357 viable cells and relies on the expertise of the technician and the cytogeneticist which is  
358 decreasing over the years because of lack of training. Hence, there is need for a more robust,  
359 high-resolution and automatable method. On the other hand, CNV-microarray represents one  
360 such robust routine tool, that has allowed an improved diagnostic yield e.g. to approximately  
361 15% for neurodevelopmental disorders,<sup>8</sup> but it lacks the ability to detect balanced aberrations  
362 such as translocations or inversions or to decipher the orientation of duplicated or inserted  
363 segments, and resolution remains restricted to a few kilobases. Sequencing based assays for SV  
364 detection are constantly improving.<sup>35; 36</sup> This includes improved CNV calling from exome or  
365 genome sequencing, however most comprehensive detection requires a combination of analysis  
366 tools.<sup>37-40</sup> Moreover, it requires the local implementation of bioinformatic pipelines that have not  
367 yet undergone a large scale clinical validation. In addition to technical and computational  
368 hurdles, SV detection by sequencing based technologies becomes difficult when breakpoints  
369 localize within repetitive sequences which is frequently observed since many SVs are caused by  
370 the non-allelic homologous recombination of repeats in the first place. It is expected that long-  
371 read sequencing may enable near perfect genomes one day, but so far technologies, analyses as  
372 well as throughput and prices do not allow its routine clinical use.<sup>17</sup>

373 In this manuscript, we have shown that genome imaging is capable of comprehensively and  
374 easily detecting all classes of chromosomal aberrations and may complement or replace current  
375 cytogenetic technologies. Our cohort was composed of a large panel of different tissues,  
376 aberrations and indications representative of what can be encountered in clinical routine. We  
377 demonstrated that optical mapping allows for the detection of balanced as well as unbalanced  
378 rearrangements at sizes ranging from few kilobases to several megabases or even entire  
379 chromosome aneuploidies. The method allows for detection of SVs down to 500 bp, but none of  
380 our clinically reported SVs were that small. Copy number variations and aneuploidies were all



381 detected by either the coverage analysis pipeline and/or structural variation analysis. Combining  
382 two analysis pipelines, one based on coverage depth and the other one based on the comparison  
383 of a *de novo* assembled genome map with a reference map, allows for the most complete  
384 detection of all balanced and unbalanced aberrations, as shown by our results. In fact, the first  
385 pipeline performs better for large deletions and duplications, and is currently the only tool to  
386 detect terminal chromosomal gains/losses or other events that do not create the fusion of  
387 unique novel molecules. The second pipeline is more sensitive to small CNVs down to few  
388 hundred base pairs, and allows for best breakpoint resolution.

389 Regarding translocation-, inversion- or insertion- events, we demonstrate that they can all be  
390 detected as long as the breakpoints do not lie within large repetitive, unmappable regions such  
391 as centromeres, p-arm of acrocentric chromosomes, or heterochromatin stretches. Challenges to  
392 map such breakpoints along with the inability of the current software to detect loss of  
393 heterozygosity were known prior to this study and such results were expected. In fact, these  
394 regions are likely not well represented in the human reference genome,<sup>41</sup> they cannot be  
395 specifically labeled and they are several megabases long, far larger than the longest single  
396 molecules that can be obtained with any current technology. Interestingly, in some cases we  
397 were able to detect translocations with breakpoints that lie in pericentromeric regions and which  
398 were not detected by paired-end whole-genome sequencing (samples 50, 51 and 54; NGS data  
399 not shown, manuscript in preparation). This additional detection did solve the molecular  
400 diagnosis for patient 54 whose karyotype is 46,XY,t(20;21)(q11.2;q21). Optical mapping showed  
401 that this balanced translocation disrupts the *DYRK1A* gene and refined the breakpoint to  
402 21q22.13. This patient displays autism spectrum disorder and microcephaly consistent with a  
403 *DYRK1A* haploinsufficiency, which has been shown to be associated with autism spectrum  
404 disorder, intellectual disability and microcephaly.<sup>42-44</sup> Similarly, other cases of gene disruption  
405 provided hints into the molecular diagnosis of intellectual disability. For example, patient 47 had

406 an inversion that we showed to likely disrupt the *SETBP1* gene and patient 49 had a t(9;17) that  
407 potentially disrupts *KANSL1* as previously identified by WGS.<sup>33</sup> In both cases, haploinsufficiency of  
408 the respective genes is known to lead to clinical syndromes including intellectual disability<sup>45, 46</sup>  
409 consistent with our patient's phenotypes.

410 Optical mapping was also able to detect complex rearrangements including multiple  
411 translocations, or even chromoanagenesis. In some cases, optical mapping results suggested a  
412 more complex event than expected (28, 47, 52, 66, 70, 74) where the additional SV calls need to  
413 be further validated. Furthermore, in four cases of isochromosome Y, the CNV pipeline detected  
414 a coverage profile that is very suggestive of an isochromosome (samples 27, 55, 57, 79) similarly  
415 to or better than CNV-microarray results, although the Bionano SV pipeline did not call the  
416 isochromosome Y. Such isochromosomes with breakpoints in the long arm of chromosome Y are  
417 not detectable by sequencing technologies.

418 As a non-sequencing based technology, single molecule optical mapping overcomes issues due to  
419 repetitive regions inaccessible to sequencing. For some aberrations, it even enabled the  
420 detection of breakpoints mapping at segmental duplications (Figure 8).<sup>47</sup>

421 It is not unlikely that at some stage (long read) sequencing approaches may allow fully  
422 comprehensive assessment of all SVs and chromosomal aberrations in each personal genome,  
423 possibly after *de novo* genome assembly instead of re-sequencing.<sup>41, 48</sup> Some benefits of optical  
424 mapping may prevail: 1.) relative ease of analysis, 2.) relative low costs, 3.) optical mapping can  
425 produce 300-1600X genome coverage allowing the reliable detection of rare somatic events,  
426 with additional improvements in development.<sup>26</sup>

427 From a technical point of view, optical mapping using Bionano can best be compared to an ultra-  
428 high resolution karyotype (~10,000 times higher resolution than the conventional karyotype) that  
429 offers a fast (3-4 days from sample to variant calls) and cost-effective (~\$450 list price per

430 genome) alternative to both karyotyping and CNV-microarray. Neither significant data storage  
431 capacities nor bioinformatics processing are required. Turnaround time has also been  
432 significantly improved in the recent years, as six genomes can be processed in a single run, and  
433 instrument price has been reduced (\$150k list price). It is also worth noting that the filter settings  
434 suggested here result in a small number of events per case (n= 41 rare SVs on average), while  
435 detecting all previously known events. This is suggestive for a low false positive rate, although  
436 orthogonal validations e.g. by sequencing were beyond the scope of this study. This may be in  
437 contrast to NGS-based SV calling: several reports point out the high number of false calls with  
438 sequencing based technologies.<sup>49, 50</sup> Additional clinical analysis filter may include overlap-analysis  
439 of SVs with known disease genes or loci. This is a crucial point since in the context of clinical  
440 routine, genetic investigation should be time-efficient since the longer the turn-around time the  
441 lower the quality of disease management especially in case of reproductive disorders. In  
442 addition, our results support the robustness of the technology as our samples were processed in  
443 three different facilities. Results were highly similar in terms of quality metrics, number of variant  
444 calls and performance stated by the rate of concordance with conventional cytogenetic analyses.  
445 Some differences in the number of calls are most likely due to different versions of analysis  
446 software used. Clinically relevant results were unchanged.

447 The technology has the potential to keep improving at both technical and analytical levels.  
448 Indeed, a closer examination of the maps or loosening the filters for few samples (34, 42, 50, 76,  
449 and 81) led to the identification of initially missed structural variants, supporting the potential of  
450 improvement of the software or analysis settings. Other aspects that are being improved to meet  
451 cytogeneticist expectations include loss of heterozygosity analysis, ideogram style representation  
452 of chromosomal aberrations, e.g. translocations, ISCN nomenclature outputs, and hyperlinks to  
453 genome databases. As with comparative genomic hybridization, polyploidies cannot be detected  
454 with the current analysis pipeline but haplotype analysis should make this detection possible.

455 The main focus here was to investigate the concordance i.e. true positive rate for known  
456 aberrations as a first step to explore the possibility to replace standard cytogenetic assays by  
457 optical mapping. In addition, it is also attractive that this can complement NGS to achieve a  
458 better and possibly nearly complete genome analysis. In developmental disorders, optical  
459 mapping could complement sequencing approaches to allow for a comprehensive genomic  
460 investigation. In reproductive disorders, it could replace karyotyping as the main method  
461 complemented by a count of few metaphase spreads by karyotyping to prevent that balanced  
462 Robertsonian or whole arm translocations are missed in few respective cases.

463 Our results pave the road to a second phase that would aim at evaluating the clinical utility of the  
464 technology for all patients referred for cytogenetic investigation and assess the added-value in  
465 terms of diagnostic yield (detection of novel SVs) and genetic counselling. In fact, samples  
466 currently investigated with CNV-microarray could have undetected balanced structural  
467 variations, or other pathogenic SVs in complex regions of the genome that remain inaccessible to  
468 CNV-microarray and NGS detection, as suggested by most recent findings in singleton research  
469 cases.<sup>47, 51</sup> Similarly, patients who have normal karyotype could bear variants that were  
470 undetected because they are below the karyotype resolution. Furthermore, the absence of  
471 sequencing could be preferred in some cases to avoid undesired incidental findings especially for  
472 some patients referred for reproductive disorders. The sensitivity of optical mapping to detect a  
473 repeat-contraction related disease such as Facio-Scapulo-Humeral Muscular Dystrophy (FSHD)<sup>52</sup>  
474 <sup>53</sup> opens up new perspectives for the detection of expansion diseases such as Fragile X syndrome  
475 or Huntington disease and SVs on the Y chromosome which is rich in repetitive sequences and  
476 still challenging for sequencing.

477 To conclude, this is the first clinical study to validate genome-mapping as a solid alternative  
478 approach to karyotyping, FISH and CNV-microarray for the detection of chromosomal aberrations  
479 in constitutional diseases. We showed that optical mapping is capable of reaching 100%

480 concordance, while detecting all different types of chromosomal anomalies including  
481 aneuploidies, CNVs as well as balanced chromosomal abnormalities and complex chromosomal  
482 rearrangements.

483

#### 484 **Acknowledgments**

485 We are thankful to the Department of Human Genetics in Nijmegen, especially Helger Yntema,  
486 Lisenka Vissers, Marcel Nelen, and Han Brunner for providing support and critical feedback. We  
487 are grateful to the Radboudumc Genome Technology Center for infrastructural and  
488 computational support. A. Hoischen, Ph.D. was supported by the Solve-RD project. The Solve-RD  
489 project has received funding from the European Union's Horizon 2020 research and innovation  
490 program under grant agreement No 779257. SOLVE-RD. This research was part of the  
491 Netherlands X-omics Initiative and partially funded by NWO, project 184.034.019 and Radboud  
492 Institute for Molecular Life Sciences PhD grants (to A. Hoischen). TM was supported by the Sigrid  
493 Jusélius Foundation.

494 We are grateful to the French "Agence de la Biomédecine" and the APHP.center Paris university  
495 hospitals for their financial support the French part of the project (granted to L. El Khattabi; AOR  
496 2018 "ART, prenatal diagnosis and genetic diagnosis" and Merri-SERI 2019, respectively). We  
497 would like also to thank Faten Hsoumi (Cytogenetics department, Cochin Hospital, Paris, France)  
498 for getting some CNV-microarray images, Emilie Chopin and Isabelle Rouvet (Cellular  
499 biotechnology center, Hospices Civils de Lyon, France) for providing lymphoblastoid cell lines, the  
500 Gentyane facility staff for providing genome imaging service for samples from Clermont-Ferrand  
501 hospital (France), and the clinical geneticists and cytogeneticists from the French ANI project  
502 whom patients were included in the present study (Bruno Delobel, Bénédicte Duban-Bedu,  
503 Dominique Martin-Coignard, Marc Planes, Céline Freihuber, Jean-Pierre Siffroi, Florence

504 Amblard, Marlène Rio, Laurence Lohman, Véronique Paquis, Françoise Devillard, Bertrand Isidor,  
505 James Lespinasse, Gwenaël Nadeau and Laurent Pasquier). The ANI project aims at better  
506 characterizing *de novo* apparently balanced chromosomal rearrangements associated with  
507 intellectual disability using high throughput sequencing (ANI study is supported by the French  
508 Ministry of Health (DGOS) and the French National Agency for Research (ANR) PRTS 2013 grant  
509 to C. Schluth-Bolard, n° PRTSN1300001N).

510 We would like to acknowledge support from scientists and staff at Bionano Genomics including  
511 Alex Hastie, Andy Pang, Lucia Muraro, Kees-Jan Francoijs, Sven Bocklandt, Yannick Delpu, Mark  
512 Oldakowski, Ernest Lam, Thomas Anantharaman, Scott Way, Henry Sadowski, Amy Files, Carly  
513 Proskow.

514

#### 515 **Declaration of Interests**

516 Bionano Genomics sponsored part of the reagents used for this manuscript. Other than this, the  
517 authors declare no competing interest.

518

#### 519 **Web Resources**

520 Bionano Access™: <https://bionanogenomics.com/support/software-downloads/#bionanoaccess>

521

## 522 **Figure Titles and Legends**

523 **Figure 1.** Description of the study population (n=85). A) Main reason for referral. B) Distribution  
524 of the different cytogenetic and molecular tests used for diagnosis. C) Distribution of  
525 chromosomal aberrations as assessed by standard of care genetic investigations.

526 **Figure 2:** SV detection and filtering. Average number of SVs detected per sample, given per type  
527 of SV (total, insertion, deletion, inversion, duplication, interchromosomal translocation and  
528 intrachromosomal translocation). Dark blue: all variants, median blue: rare variants only (not  
529 found in control database including 204 samples), light blue: rare variants that overlap with  
530 genes.

531 **Figure 3:** Visual representation of optical mapping data **A)** Genome-wide circos plot showing all  
532 24 chromosomes in a circular way. For each chromosome, the ideograms are shown at the  
533 outside of the circosplot, with ideogram-style chromosomal banding and the centromeres in red.  
534 Different colored dots in the boxes underneath represent different called SVs. The blue line in  
535 the box underneath represents the CNV profile, with each peak representing a CNV call. **B)** Part  
536 of a circos plot, showing the sex chromosomes. The blue CNV line shows two copies of  
537 chromosome X, as for autosomes, and one copy of chromosome Y consistent with a sex  
538 chromosome aneuploidy (47,XXY, resulting in Klinefelter syndrome).

539 **Figure 4:** Representation of different chromosomal aberrations. A) Sample 1. Left: CNV  
540 microarray data showing an 8p22p21.3(18825888\_19364764) deletion. Middle: Genome-wide  
541 circos plot showing all chromosomes. The deletion is detected by the CNV and the SV pipeline  
542 (blue circle). Right: genome map with reference, showing the deletion and affected genes (hg19).  
543 B) Sample 18. Left: karyogram showing a 46,XY,t(5;8)(p13.1;p11.2) karyotype. Middle: circos  
544 plots with a pink line connecting chromosomes 5 and 8, representing the translocation. Right:  
545 genome map, of which the left part maps to chromosome 8 and the right part to chromosome 5.

546 C) Sample 15. Left: karyogram showing an inversion on chromosome 13 (red arrow). Middle:  
547 circos plot showing the inversion as an intrachromosomal translocation. Right: genome map that  
548 is partly inverted when compared to the reference. One of the breakpoints is interrupting the  
549 gene *KLHL1*.

550 **Figure 5:** Isodicentric Y-chromosomes show specific bionano assembly map patterns. A) GTG-and  
551 RHG banding of X- and Y- chromosomes of sample 57. B) FISH for sample 57 using probes  
552 TelXp/Yp and RP11-209I11 (Yq11.223). C) Bionano genome maps of Y-chromosomes of samples  
553 69 (no isodicentric chrY), 55, 57, 27 and 79. Dotted red boxes indicate where isodicentric Y-  
554 chromosomes have no coverage when compared to non-isodicentric Y chromosomes (the top  
555 genome map).

556 **Figure 6:** Small X ring chromosome. A) Karyogram of sample 39. The red arrow is pointing  
557 towards the small X ring chromosome. B) Circos-plot (of chromosome X only) of sample 39. The  
558 pink line in the center of the circosplot is indicating the presence of the ring chromosome (called  
559 as an intrachromosomal translocation). C) Different genome maps (dark blue bars on top and  
560 below the reference) indicating the presence of the ring chromosome. The individual molecules  
561 for the genome map below the reference (highlighted by a red circle) are shown at the bottom of  
562 this figure. The left part of these molecules (light green bar) map to a region upstream of the  
563 centromere, whereas the right part of the same molecules (light blue bar) map to a region  
564 downstream of the centromere.

565 **Figure 7.** Examples of inversions and translocations interrupting well known disease causing  
566 genes. A) Inversion  $inv(18q)(q22.1q12.3)$ , disrupting the *SETBP1* gene in sample 47. B)  
567 Translocation  $t(9;17)(p13.3;q21.31)$ , interrupting the gene *KANSL1* in sample 49. C) Translocation  
568  $t(20;21)(q11.22;q22.13)$ , interrupting the genes *DYRK1A* and *PIGU* in sample 54.



569 **Figure 8.** Example of a typical 22q11.2 microdeletion syndrome, in sample 2 (VCF, Di-George  
570 syndrome). A) Affymetrix CytoScan HD array, showing the 22q11.21(18308819\_18519921)x1  
571 deletion. B) Bionano circos plot, showing an aberrant CNV profile on 22.q11.21. C) Bionano  
572 genome maps of chr22q11.21, showing the CNV calls (on top), a segmental duplication bed file  
573 (below), the chromosome 22 reference genome map (again below) and the different genome  
574 maps (at the bottom). The deletion is clearly called by the CNV calls, and is surrounded by  
575 segmental duplications. \*SV not called with standard filters, but recovered when % of the  
576 Bionano control sample overlap was set to 80%.

577 **Figure 9:** Complex sample 28. A) Karyogram showing the translocation t(3;6) and the derivative  
578 chromosomes 4 and 5. B) CNV microarray data showing two *de novo* deletions on chromosome 4  
579 and 5. C) Bionano circos plot of chromosomes 3, 4, 5, 6 and 13. The Bionano data confirm all  
580 previous data and show the presence of additional translocations t(3;4) and t(4;6) plus an  
581 inversion on chromosome 13.

582 **Figure 10:** Complex sample 66. A) CGH Panes of sample 66, showing the whole chromosome 3  
583 (left) and chr3:64105005-74361806 (right). B) Karyogram of sample 66:  
584 46,XY,t(3;13;5)(p11.1;p12;p14). C) Genome maps of chromosome 3 of sample 66, showing  
585 multiple rearrangements on chromosome 3. D) Circos plot of chromosomes 3 and 5, showing  
586 multiple intrachromosomal translocations on chromosome 3 and a translocation between  
587 chromosomes 3 and 5.

588

## 589 **Abbreviations**

590 CNV copy number variant

591 DD developmental disorder

- 592 DLE-1 direct Labeling Enzyme-1
- 593 DLS direct Label and Stain
- 594 EDTA ethylenediaminetetraacetic acid
- 595 FISH fluorescence in situ hybridization
- 596 FSHD facioscapulohumeral dystrophy
- 597 gDNA genomic DNA
- 598 ID intellectual disability
- 599 i.e. id est (that is)
- 600 MCA multiple congenital malformations
- 601 NGS next generation sequencing
- 602 SV structural variant
- 603 UHMW ultra-long high molecular weight
- 604 WES whole exome sequencing
- 605 WGS whole genome sequencing
- 606
- 607 **Supplemental Data Description**
- 608 Supplemental Data includes 6 figures and 3 tables.

609 **Supplementary Figure 1.** Workflow of the Bionano technique. For this study, 85 samples for  
610 whom extra material was available were included. Ultra-high molecular weight DNA was  
611 extracted using the Bionano solution phase DNA isolation method. Labeling was done using the  
612 DLE-1 chemistry. High resolution imaging of DNA molecules was done on Bionano Saphyr  
613 instruments. As different centers were included, different amount of data was produced  
614 (~800Gbp for Radboud, ~300Gbp for the French centers), and samples were analyzed using  
615 different software versions (3.4.1 and 3.5). A *de novo* assembly was performed, and both SVs and  
616 CNVs were called.

617 **Supplementary Figure 2.** Representative Bionano CNV profiles for different samples. A) Sample  
618 2. Loss of 22q11.21(18645354\_21465660). B) Sample 8. Gain of 17p12(14087934\_15436895). C)  
619 Sample 70. Loss of 6q14.1q14.3(76385698\_86884355), and gain of 6q16.1(97661978\_98726638).  
620 D) Genome-wide CNV view (available in Bionano Solve v1.5) of sample 73 with E) chromosome 8  
621 highlighted (showing a deletion) and F) chromosome 17 highlighted (showing a duplication).  
622 Blue: gains, Red: losses.

623 **Supplementary Figure 3:** Isochromosomes. A) Sample 77 (ish  
624 idic(15)(D15Z1+,SNRPN++,D15Z1+)). Left: Circos plot showing an abnormal CNV profile on  
625 chromosome 15. Top right: CNV-microarray data showing a gain on chr15. Bottom right: optical  
626 mapping data, showing a CNV profile that is nearly identical to the CNV-microarray profile.  
627 Numbers present fractional copy numbers. B) Sample 78 (46,X,idic(X)(p11.21)). Left: Circos plot  
628 showing a CNV baseline suggesting one copy of chromosome X (compared to the CNV line of  
629 chr22 partially shown on the left side). Additionally, the CNV profile shows a mosaic “gain”  
630 (compared to the baseline) on part of the chrX p-arm and the whole q-arm. Top right: CNV-  
631 microarray data showing a global loss on chrX (compared to a 46,XX control sample). However,  
632 the degree of loss varies within the chromosome consistent with a mosaic  
633 45,X/46,X,idic(X)(p11.21) karyotype. Bottom right: optical mapping data showing a CNV profile

634 that is nearly identical to the CNV-microarray profile. Numbers present fractional copy numbers.  
635 Red box shows parts of the chromosome 15 and X respectively that make up the iso-chromosomes.  
636 Grey box indicates the centromere (15 and X) and/or acrocentric p-arm (15).

637

638 **Supplementary Figure 4.** Genome imaging breakpoint detection for translocation  
639  $t(9;17)(p13;q21)$ , disrupting the gene *KANSL1* (patient 49). The two green bars represent the  
640 references of chromosomes 9 and 17, respectively. The mint bar in between represents the  
641 genome map of the translocation. The blue bar underneath represents the *KANSL1* gene. Small  
642 vertical black lines represent identified labels, and the red vertical lines indicate the translocation  
643 breakpoints, with an uncertain region of 3,828 bp in between shown in purple. The breakpoints  
644 are located between basepair-positions 35,771,617 and 35,773,383 on chromosome 9, and  
645 between 44,137,912 and 44,141,740 on chromosome 17.

646 **Supplementary Figure 5:** Complex sample 52. A) Karyotype of sample 52, interpreted as  
647  $46,XY,der(8)t(8;22)(q12;q12),der(13)t(8;13)(q31;q23),der(14)t(14;15)(q11.2;q25),der(15)t(14;15)($   
648  $q21;q24),der(22)t(13;22)(q31.1;p11.2)$ . B) FISH of sample 52, using FISH probes wcp8 (red),  
649 wcp14 (green). C) FISH of sample 52, using FISH probes wcp8 (green), wcp13 (red). D) FISH of  
650 sample 52, using FISH probes wcp15 (green), wcp22 (red). E) Bionano circos plot, showing  
651 different translocations  $t(8;13)$ ,  $t(8;14)$ ,  $t(14,15)$ , and intrachromosomal translocations on chr 8  
652 and chr 15.

653 **Supplementary Figure 6:** Complex sample 55. A) Karyotype of sample 55, interpreted as  
654  $46,X,idelic(Y)(q11.22),t(5;8)(q23;q24),t(5;11)(p12;p13)[32/50]/45,X,t(5;8)(q23;q24),t(5;11)(p12;p13$   
655  $)[10/50]/47,XY,idelic(Y)(q11.22),t(5;8)(q23;q24),t(5;11)(p12;p13)[8/50]$ . B) FISH of sample 55,  
656 showing the translocations  $t(5;8)$  (left) and  $t(5;11)$  (right). C) Bionano circos plot of sample 55,  
657 showing the translocations  $t(5;8)$ ,  $t(5;11)$  and an intrachromosomal translocations 5. D) Bionano

658 genome maps, showing the intrachromosomal translocation on chromosome 5, which is  
659 disrupting the gene *GHR*.

660

661 Supplementary Table 1: Comparison of previous diagnostic findings with genome imaging results

662 Supplementary Table 2: Technical performance of genome imaging

663 Supplementary Table 3: Overall numbers of variants per sample

664

## 665 **References**

- 666 1. Vissers, L.E., Veltman, J.A., van Kessel, A.G., and Brunner, H.G. (2005). Identification  
667 of disease genes by whole genome CGH arrays. *Hum Mol Genet* 14 Spec No. 2,  
668 R215-223.
- 669 2. Speicher, M.R., and Carter, N.P. (2005). The new cytogenetics: blurring the  
670 boundaries with molecular biology. *Nat Rev Genet* 6, 782-792.
- 671 3. Smeets, D.F. (2004). Historical prospective of human cytogenetics: from microscope to  
672 microarray. *Clin Biochem* 37, 439-446.
- 673 4. Chantot-Bastaraud, S., Ravel, C., and Siffroi, J.P. (2008). Underlying karyotype  
674 abnormalities in IVF/ICSI patients. *Reprod Biomed Online* 16, 514-522.
- 675 5. Hofherr, S.E., Wiktor, A.E., Kipp, B.R., Dawson, D.B., and Van Dyke, D.L. (2011).  
676 Clinical diagnostic testing for the cytogenetic and molecular causes of male  
677 infertility: the Mayo Clinic experience. *J Assist Reprod Genet* 28, 1091-1098.
- 678 6. De Braekeleer, M., and Dao, T.N. (1990). Cytogenetic studies in couples experiencing  
679 repeated pregnancy losses. *Hum Reprod* 5, 519-528.
- 680 7. De Braekeleer, M., and Dao, T.N. (1991). Cytogenetic studies in male infertility: a  
681 review. *Hum Reprod* 6, 245-250.
- 682 8. Miller, D.T., Adam, M.P., Aradhya, S., Biesecker, L.G., Brothman, A.R., Carter, N.P.,  
683 Church, D.M., Crolla, J.A., Eichler, E.E., Epstein, C.J., et al. (2010). Consensus  
684 statement: chromosomal microarray is a first-tier clinical diagnostic test for  
685 individuals with developmental disabilities or congenital anomalies. *Am J Hum*  
686 *Genet* 86, 749-764.
- 687 9. Alkan, C., Coe, B.P., and Eichler, E.E. (2011). Genome structural variation discovery  
688 and genotyping. *Nat Rev Genet* 12, 363-376.
- 689 10. Schinzel, A. (2001). Catalogue of unbalanced chromosome aberrations in man.
- 690 11. van Karnebeek, C.D., Jansweijer, M.C., Leenders, A.G., Offringa, M., and Hennekam,  
691 R.C. (2005). Diagnostic investigations in individuals with mental retardation: a  
692 systematic literature review of their usefulness. *Eur J Hum Genet* 13, 6-25.
- 693 12. de Vries, B.B., Pfundt, R., Leisink, M., Koolen, D.A., Vissers, L.E., Janssen, I.M.,  
694 Reijmersdal, S., Nillesen, W.M., Huys, E.H., Leeuw, N., et al. (2005). Diagnostic  
695 genome profiling in mental retardation. *Am J Hum Genet* 77, 606-616.

- 696 13. Gilissen, C., Hehir-Kwa, J.Y., Thung, D.T., van de Vorst, M., van Bon, B.W.,  
697 Willemsen, M.H., Kwint, M., Janssen, I.M., Hoischen, A., Schenck, A., et al.  
698 (2014). Genome sequencing identifies major causes of severe intellectual  
699 disability. *Nature* 511, 344-347.
- 700 14. Lionel, A.C., Costain, G., Monfared, N., Walker, S., Reuter, M.S., Hosseini, S.M.,  
701 Thiruvahindrapuram, B., Merico, D., Jobling, R., Nalpathamkalam, T., et al.  
702 (2018). Improved diagnostic yield compared with targeted gene sequencing  
703 panels suggests a role for whole-genome sequencing as a first-tier genetic test.  
704 *Genet Med* 20, 435-443.
- 705 15. Stavropoulos, D.J., Merico, D., Jobling, R., Bowdin, S., Monfared, N.,  
706 Thiruvahindrapuram, B., Nalpathamkalam, T., Pellecchia, G., Yuen, R.K.C.,  
707 Szego, M.J., et al. (2016). Whole Genome Sequencing Expands Diagnostic Utility  
708 and Improves Clinical Management in Pediatric Medicine. *NPJ Genom Med* 1.
- 709 16. Chaisson, M.J.P., Sanders, A.D., Zhao, X., Malhotra, A., Porubsky, D., Rausch, T.,  
710 Gardner, E.J., Rodriguez, O.L., Guo, L., Collins, R.L., et al. (2019). Multi-platform  
711 discovery of haplotype-resolved structural variation in human genomes. *Nat*  
712 *Commun* 10, 1784.
- 713 17. Mantere, T., Kersten, S., and Hoischen, A. (2019). Long-Read Sequencing Emerging  
714 in Medical Genetics. *Front Genet* 10, 426.
- 715 18. Merker, J.D., Wenger, A.M., Sneddon, T., Grove, M., Zappala, Z., Fresard, L.,  
716 Waggott, D., Utiramerur, S., Hou, Y., Smith, K.S., et al. (2018). Long-read  
717 genome sequencing identifies causal structural variation in a Mendelian disease.  
718 *Genet Med* 20, 159-163.
- 719 19. Mizuguchi, T., Suzuki, T., Abe, C., Umemura, A., Tokunaga, K., Kawai, Y.,  
720 Nakamura, M., Nagasaki, M., Kinoshita, K., Okamura, Y., et al. (2019). A 12-kb  
721 structural variation in progressive myoclonic epilepsy was newly identified by  
722 long-read whole-genome sequencing. *J Hum Genet* 64, 359-368.
- 723 20. Schwartz, D.C., Li, X., Hernandez, L.I., Ramnarain, S.P., Huff, E.J., and Wang, Y.K.  
724 (1993). Ordered restriction maps of *Saccharomyces cerevisiae* chromosomes  
725 constructed by optical mapping. *Science* 262, 110-114.
- 726 21. Lam, E.T., Hastie, A., Lin, C., Ehrlich, D., Das, S.K., Austin, M.D., Deshpande, P.,  
727 Cao, H., Nagarajan, N., Xiao, M., et al. (2012). Genome mapping on nanochannel  
728 arrays for structural variation analysis and sequence assembly. *Nat Biotechnol*  
729 30, 771-776.
- 730 22. Chan, S., Lam, E., Saghbini, M., Bocklandt, S., Hastie, A., Cao, H., Holmlin, E., and  
731 Borodkin, M. (2018). Structural Variation Detection and Analysis Using Bionano  
732 Optical Mapping. *Methods Mol Biol* 1833, 193-203.
- 733 23. Wang, M., Tu, L., Yuan, D., Zhu, Shen, C., Li, J., Liu, F., Pei, L., Wang, P., Zhao, G.,  
734 et al. (2019). Reference genome sequences of two cultivated allotetraploid  
735 cottons, *Gossypium hirsutum* and *Gossypium barbadense*. *Nat Genet* 51, 224-  
736 229.
- 737 24. Kronenberg, Z.N., Fiddes, I.T., Gordon, D., Murali, S., Cantsilieris, S., Meyerson,  
738 O.S., Underwood, J.G., Nelson, B.J., Chaisson, M.J.P., Dougherty, M.L., et al.  
739 (2018). High-resolution comparative analysis of great ape genomes. *Science* 360.
- 740 25. Nowoshilow, S., Schloissnig, S., Fei, J.F., Dahl, A., Pang, A.W.C., Pippel, M.,  
741 Winkler, S., Hastie, A.R., Young, G., Roscito, J.G., et al. (2018). The axolotl  
742 genome and the evolution of key tissue formation regulators. *Nature* 554, 50-55.
- 743 26. Neveling, K., Mantere, T., Vermeulen, S., Oorsprong, M., van Beek, R., Kater-Baats,  
744 E., Pauper, M., van der Zande, G., Smeets, D., Weghuis, D.O., et al. (2020). Next  
745 generation cytogenetics: comprehensive assessment of 48 leukemia genomes by  
746 genome imaging. *bioRxiv*, 2020.2002.2006.935742.
- 747 27. Barseghyan, H., Delot, E.C., and Vilain, E. (2018). New technologies to uncover the  
748 molecular basis of disorders of sex development. *Mol Cell Endocrinol* 468, 60-69.
- 749 28. Du, C., Mark, D., Wappenschmidt, B., Bockmann, B., Pabst, B., Chan, S., Cao, H.,  
750 Morlot, S., Scholz, C., Auber, B., et al. (2018). A tandem duplication of BRCA1

- 751 exons 1-19 through DHX8 exon 2 in four families with hereditary breast and  
752 ovarian cancer syndrome. *Breast Cancer Res Treat* 172, 561-569.
- 753 29. Levy-Sakin, M., Pastor, S., Mostovoy, Y., Li, L., Leung, A.K.Y., McCaffrey, J., Young,  
754 E., Lam, E.T., Hastie, A.R., Wong, K.H.Y., et al. (2019). Genome maps across 26  
755 human populations reveal population-specific patterns of structural variation. *Nat*  
756 *Commun* 10, 1025.
- 757 30. Bates, S.E. (2011). Classical cytogenetics: karyotyping techniques. *Methods Mol Biol*  
758 767, 177-190.
- 759 31. [https://bionanogenomics.com/wp-content/uploads/2018/04/30110-Bionano-Solve-](https://bionanogenomics.com/wp-content/uploads/2018/04/30110-Bionano-Solve-Theory-of-Operation-Structural-Variant-Calling.pdf)  
760 [Theory-of-Operation-Structural-Variant-Calling.pdf](https://bionanogenomics.com/wp-content/uploads/2018/04/30110-Bionano-Solve-Theory-of-Operation-Structural-Variant-Calling.pdf).
- 761 32. [https://bionanogenomics.com/wp-content/uploads/2018/04/30210-Introduction-to-](https://bionanogenomics.com/wp-content/uploads/2018/04/30210-Introduction-to-Copy-Number-Analysis.pdf)  
762 [Copy-Number-Analysis.pdf](https://bionanogenomics.com/wp-content/uploads/2018/04/30210-Introduction-to-Copy-Number-Analysis.pdf).
- 763 33. Schluth-Bolard, C., Diguët, F., Chatron, N., Rollat-Farnier, P.A., Bardel, C., Afenjar,  
764 A., Amblard, F., Amiel, J., Blesson, S., Callier, P., et al. (2019). Whole genome  
765 paired-end sequencing elucidates functional and phenotypic consequences of  
766 balanced chromosomal rearrangement in patients with developmental disorders. *J*  
767 *Med Genet* 56, 526-535.
- 768 34. Weissensteiner, M.H., Pang, A.W.C., Bunikis, I., Hoijer, I., Vinnere-Petterson, O.,  
769 Suh, A., and Wolf, J.B.W. (2017). Combination of short-read, long-read, and  
770 optical mapping assemblies reveals large-scale tandem repeat arrays with  
771 population genetic implications. *Genome Res* 27, 697-708.
- 772 35. Redin, C., Brand, H., Collins, R.L., Kammin, T., Mitchell, E., Hodge, J.C., Hanscom,  
773 C., Pillalamarri, V., Seabra, C.M., Abbott, M.A., et al. (2017). The genomic  
774 landscape of balanced cytogenetic abnormalities associated with human  
775 congenital anomalies. *Nat Genet* 49, 36-45.
- 776 36. Dong, Z., Wang, H., Chen, H., Jiang, H., Yuan, J., Yang, Z., Wang, W.J., Xu, F., Guo,  
777 X., Cao, Y., et al. (2018). Identification of balanced chromosomal rearrangements  
778 previously unknown among participants in the 1000 Genomes Project:  
779 implications for interpretation of structural variation in genomes and the future of  
780 clinical cytogenetics. *Genet Med* 20, 697-707.
- 781 37. Kosugi, S., Momozawa, Y., Liu, X., Terao, C., Kubo, M., and Kamatani, Y. (2019).  
782 Comprehensive evaluation of structural variation detection algorithms for whole  
783 genome sequencing. *Genome Biol* 20, 117.
- 784 38. Monlong, J., Cossette, P., Meloche, C., Rouleau, G., Girard, S.L., and Bourque, G.  
785 (2018). Human copy number variants are enriched in regions of low mappability.  
786 *Nucleic Acids Res* 46, 7236-7249.
- 787 39. Luo, F. (2019). A systematic evaluation of copy number alterations detection methods  
788 on real SNP array and deep sequencing data. *BMC Bioinformatics* 20, 692.
- 789 40. Zhao, L., Liu, H., Yuan, X., Gao, K., and Duan, J. (2020). Comparative study of whole  
790 exome sequencing-based copy number variation detection tools. *BMC*  
791 *Bioinformatics* 21, 97.
- 792 41. Miga, K.H., Koren, S., Rhie, A., Vollger, M.R., Gershman, A., Bzikadze, A., Brooks,  
793 S., Howe, E., Porubsky, D., Logsdon, G.A., et al. (2020). Telomere-to-telomere  
794 assembly of a complete human X chromosome. *Nature*.
- 795 42. Lee, K.S., Choi, M., Kwon, D.W., Kim, D., Choi, J.M., Kim, A.K., Ham, Y., Han, S.B.,  
796 Cho, S., and Cheon, C.K. (2020). A novel de novo heterozygous DYRK1A  
797 mutation causes complete loss of DYRK1A function and developmental delay. *Sci*  
798 *Rep* 10, 9849.
- 799 43. van Bon, B.W., Coe, B.P., Bernier, R., Green, C., Gerds, J., Witherspoon, K.,  
800 Kleefstra, T., Willemsen, M.H., Kumar, R., Bosco, P., et al. (2016). Disruptive de  
801 novo mutations of DYRK1A lead to a syndromic form of autism and ID. *Mol*  
802 *Psychiatry* 21, 126-132.
- 803 44. Ji, J., Lee, H., Argiropoulos, B., Dorrani, N., Mann, J., Martinez-Agosto, J.A., Gomez-  
804 Ospina, N., Gallant, N., Bernstein, J.A., Hudgins, L., et al. (2015). DYRK1A  
805 haploinsufficiency causes a new recognizable syndrome with microcephaly,

- 806 intellectual disability, speech impairment, and distinct facies. *Eur J Hum Genet* 23,  
807 1473-1481.
- 808 45. Coe, B.P., Witherspoon, K., Rosenfeld, J.A., van Bon, B.W., Vulto-van Silfhout, A.T.,  
809 Bosco, P., Friend, K.L., Baker, C., Bueno, S., Vissers, L.E., et al. (2014). Refining  
810 analyses of copy number variation identifies specific genes associated with  
811 developmental delay. *Nat Genet* 46, 1063-1071.
- 812 46. Koolen, D.A., Kramer, J.M., Neveling, K., Nillesen, W.M., Moore-Barton, H.L.,  
813 Elmslie, F.V., Toutain, A., Amiel, J., Malan, V., Tsai, A.C., et al. (2012). Mutations  
814 in the chromatin modifier gene *KANSL1* cause the 17q21.31 microdeletion  
815 syndrome. *Nat Genet* 44, 639-641.
- 816 47. Demaerel, W., Mostovoy, Y., Yilmaz, F., Vervoort, L., Pastor, S., Hestand, M.S.,  
817 Swillen, A., Vergaelen, E., Geiger, E.A., Coughlin, C.R., et al. (2019). The 22q11  
818 low copy repeats are characterized by unprecedented size and structural  
819 variability. *Genome Res* 29, 1389-1401.
- 820 48. Chaisson, M.J., Wilson, R.K., and Eichler, E.E. (2015). Genetic variation and the de  
821 novo assembly of human genomes. *Nat Rev Genet* 16, 627-640.
- 822 49. Cameron, D.L., Di Stefano, L., and Papenfuss, A.T. (2019). Comprehensive  
823 evaluation and characterisation of short read general-purpose structural variant  
824 calling software. *Nat Commun* 10, 3240.
- 825 50. Mahmoud, M., Gobet, N., Cruz-Davalos, D.I., Mounier, N., Dessimoz, C., and  
826 Sedlazeck, F.J. (2019). Structural variant calling: the long and the short of it.  
827 *Genome Biol* 20, 246.
- 828 51. Cretu Stancu, M., van Roosmalen, M.J., Renkens, I., Nieboer, M.M., Middelkamp, S.,  
829 de Ligt, J., Pregno, G., Giachino, D., Mandrile, G., Espejo Valle-Inclan, J., et al.  
830 (2017). Mapping and phasing of structural variation in patient genomes using  
831 nanopore sequencing. *Nat Commun* 8, 1326.
- 832 52. Zheng, Y., Kong, L., Xu, H., Lu, Y., Zhao, X., Yang, Y., Yu, G., Li, P., Liang, F., Jin,  
833 H., et al. (2020). Rapid prenatal diagnosis of Facioscapulohumeral Muscular  
834 Dystrophy 1 by combined Bionano optical mapping and karyomapping. *Prenat*  
835 *Diagn* 40, 317-323.
- 836 53. Dai, Y., Li, P., Wang, Z., Liang, F., Yang, F., Fang, L., Huang, Y., Huang, S., Zhou, J.,  
837 Wang, D., et al. (2020). Single-molecule optical mapping enables quantitative  
838 measurement of D4Z4 repeats in facioscapulohumeral muscular dystrophy  
839 (FSHD). *J Med Genet* 57, 109-120.
- 840



**Figure 1:** Description of the study population (n=85)

**A**

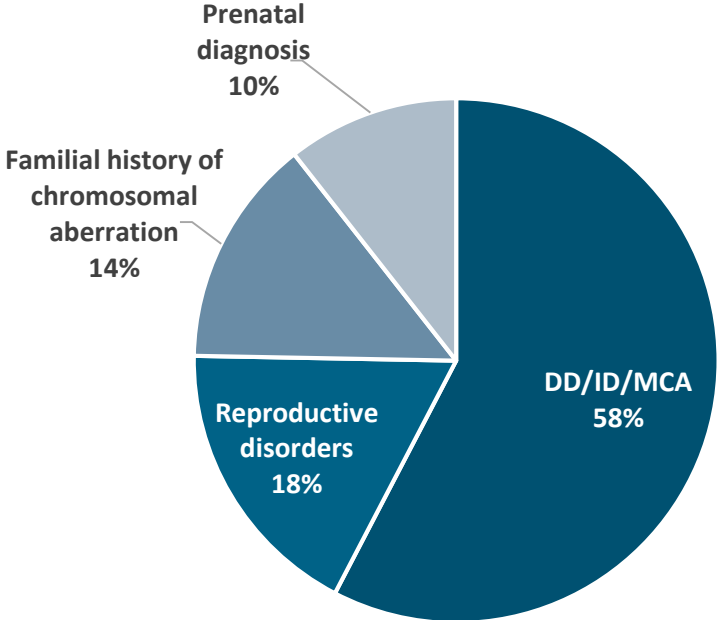

**B**

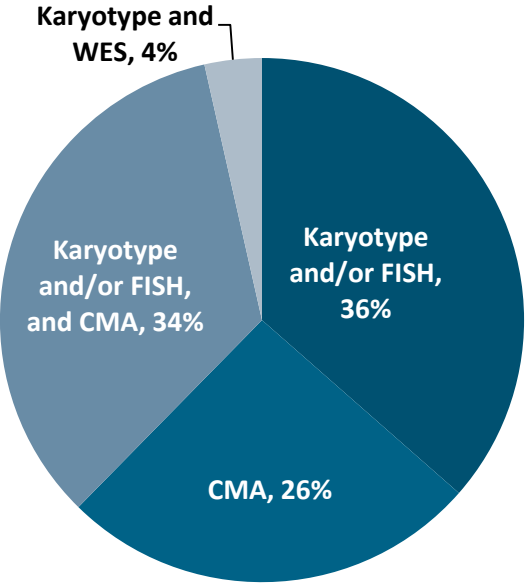

**C**

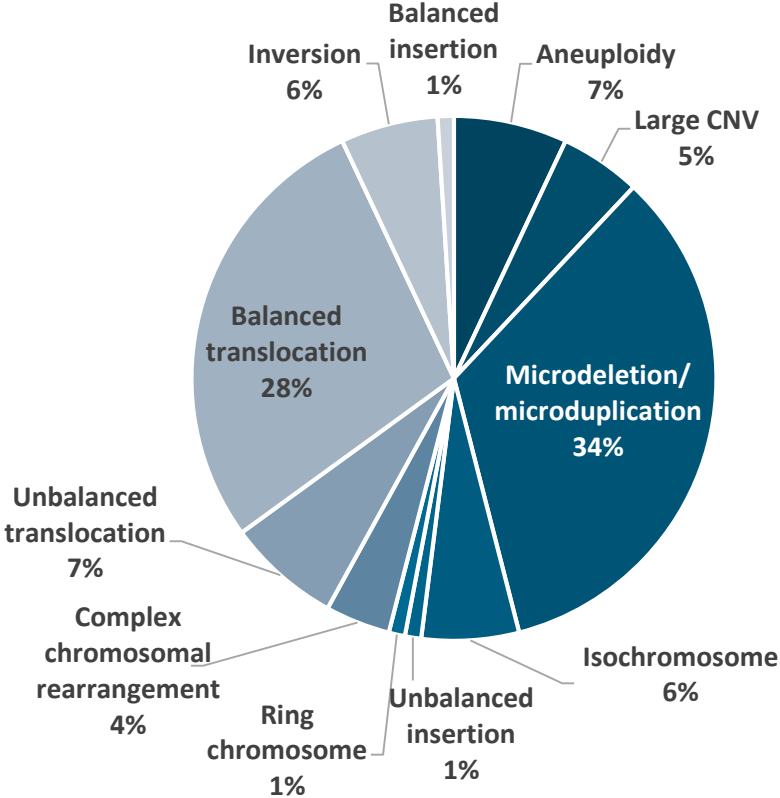

**Figure 2: SV detection and filtering**

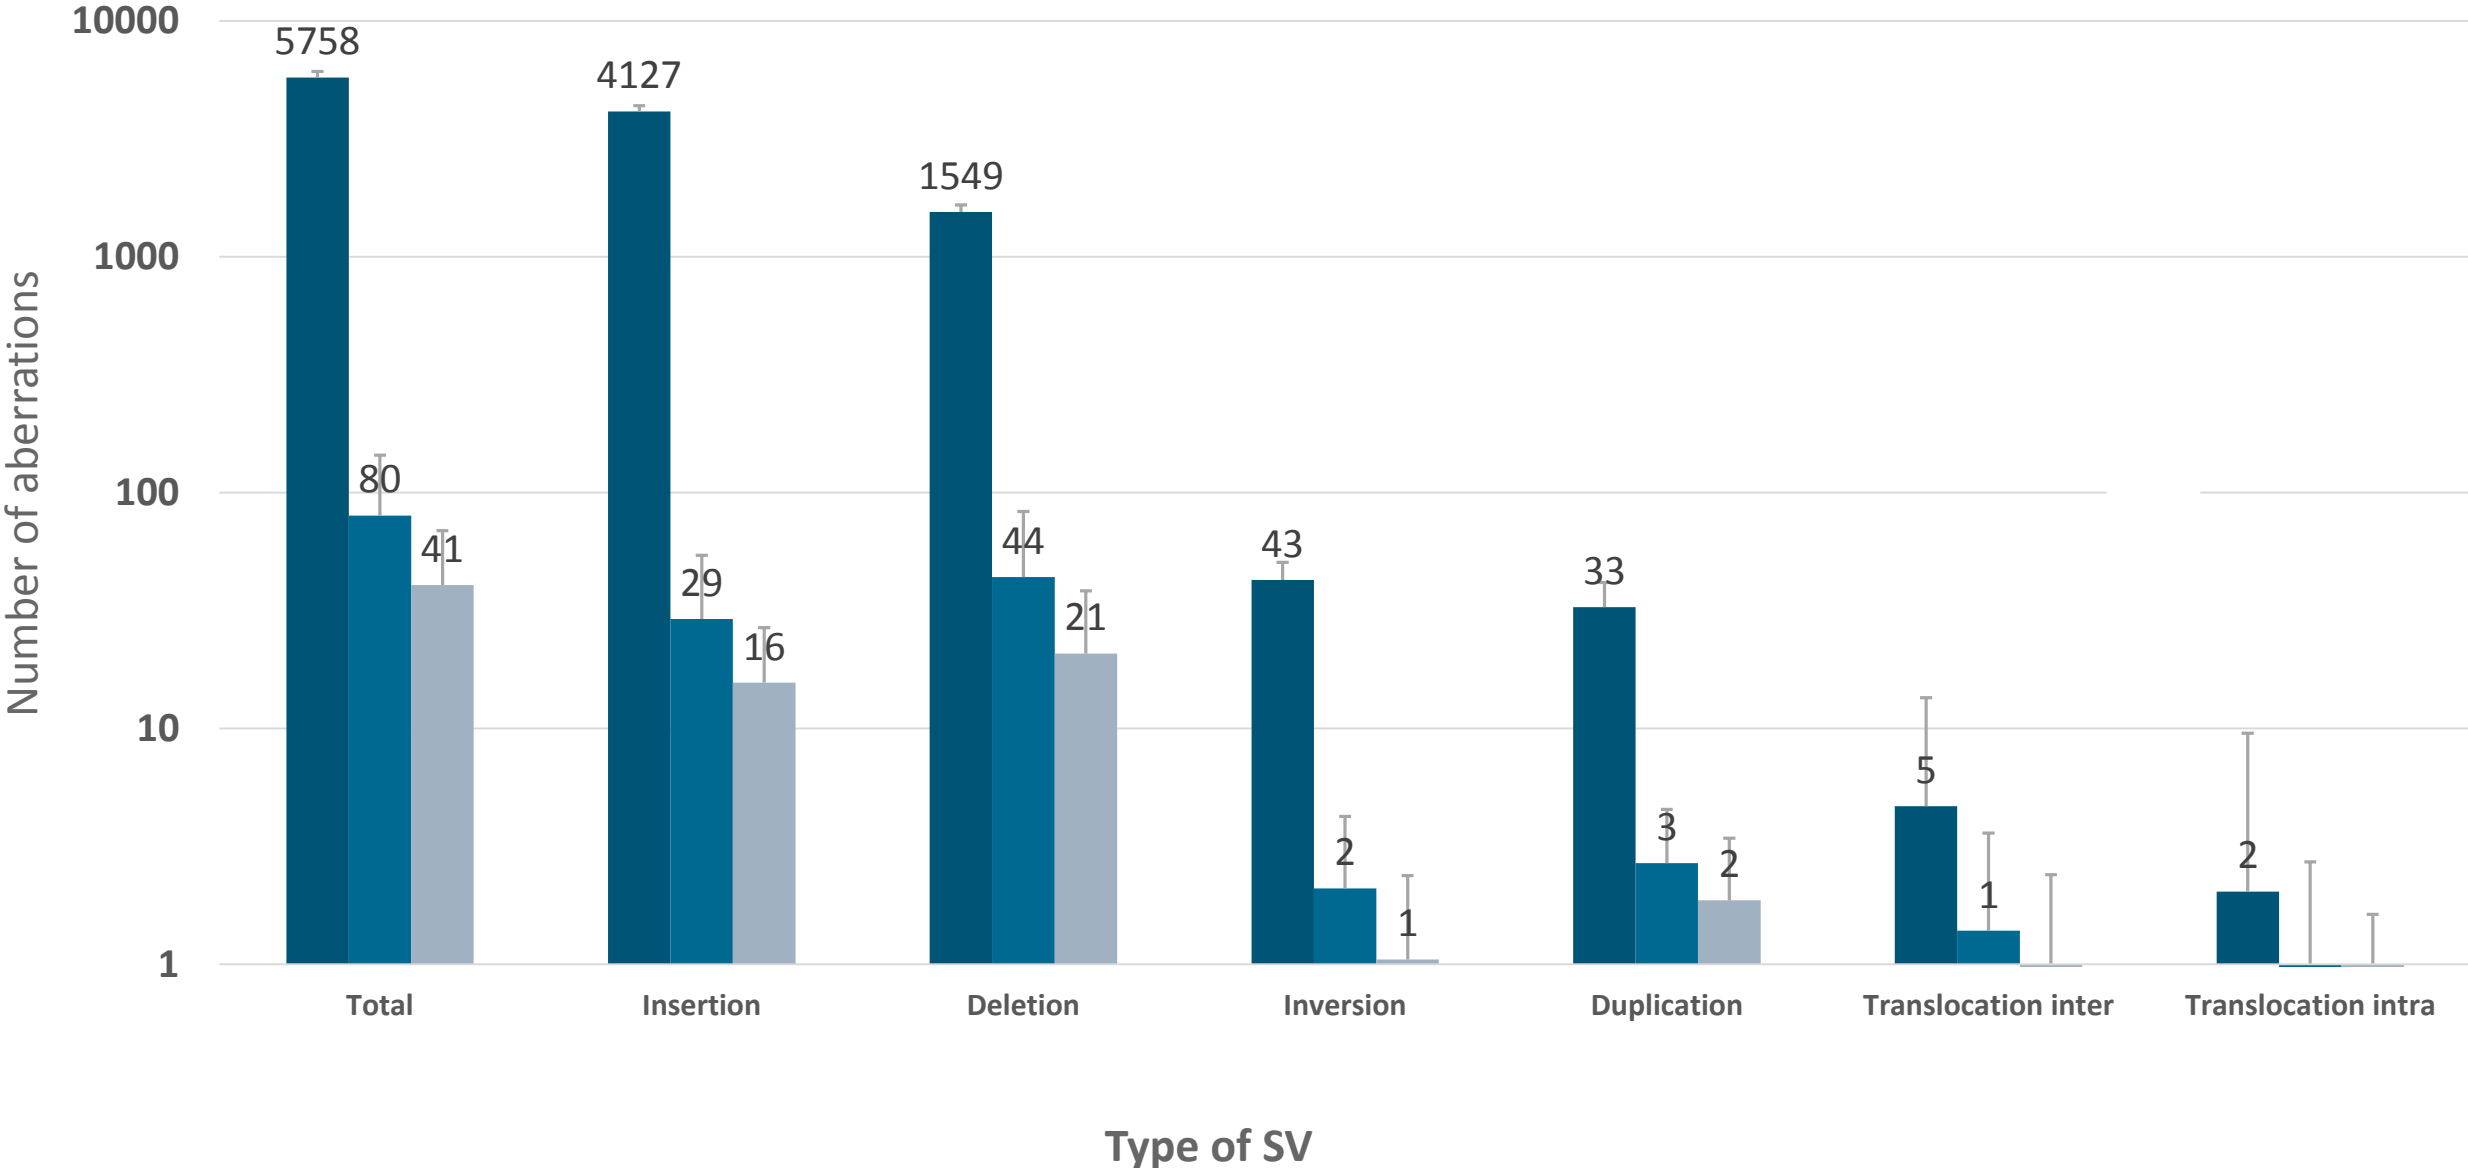

**Figure 3:** Visual representation of optical mapping data

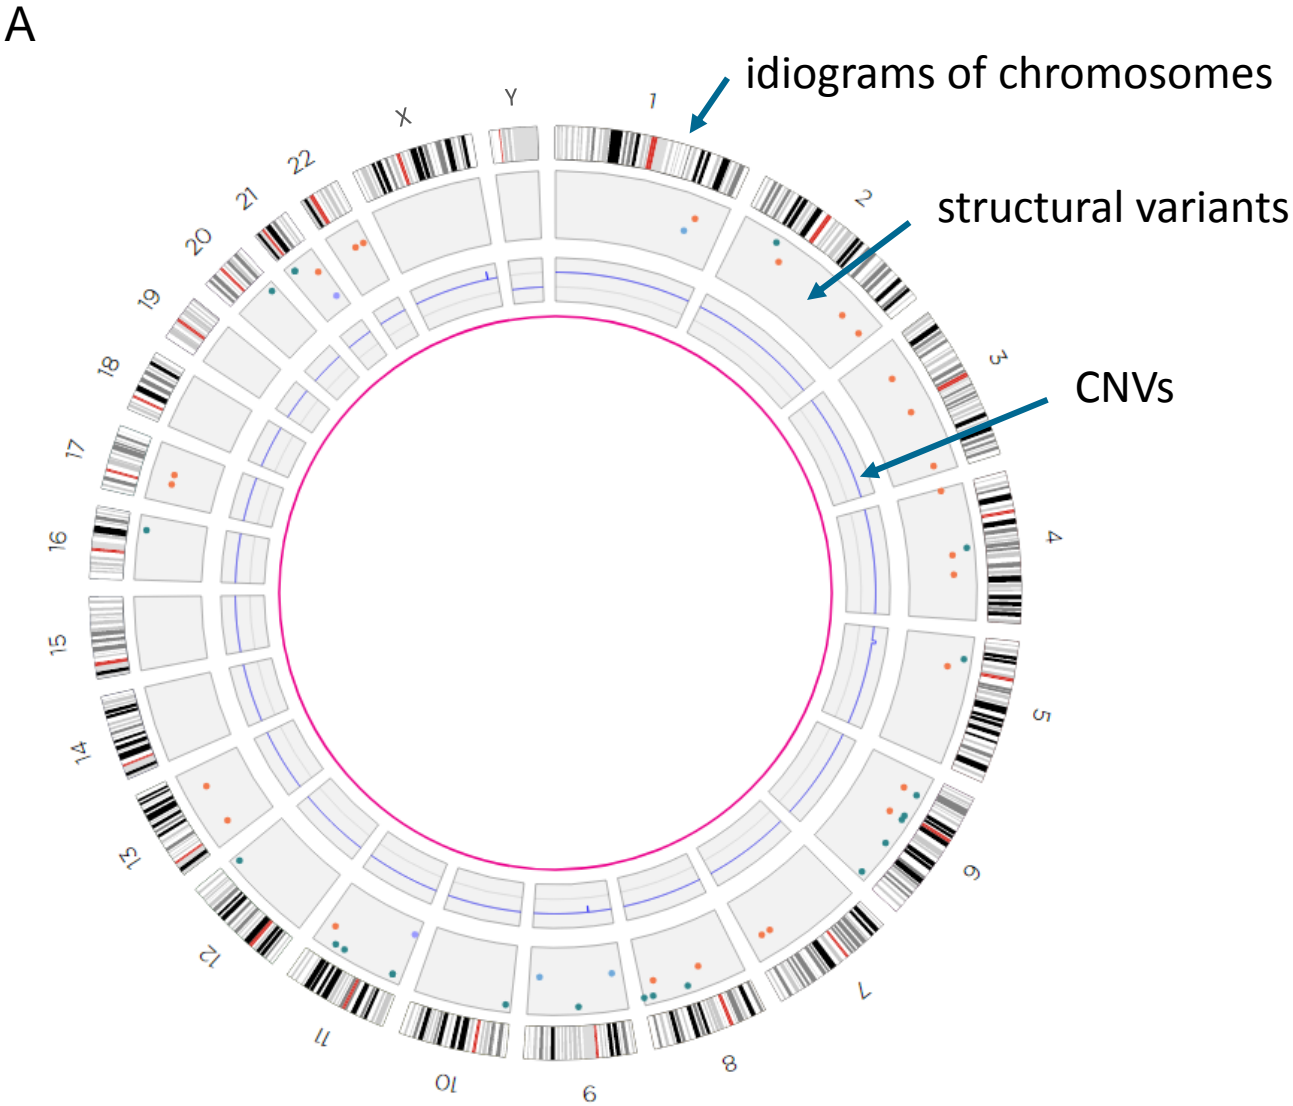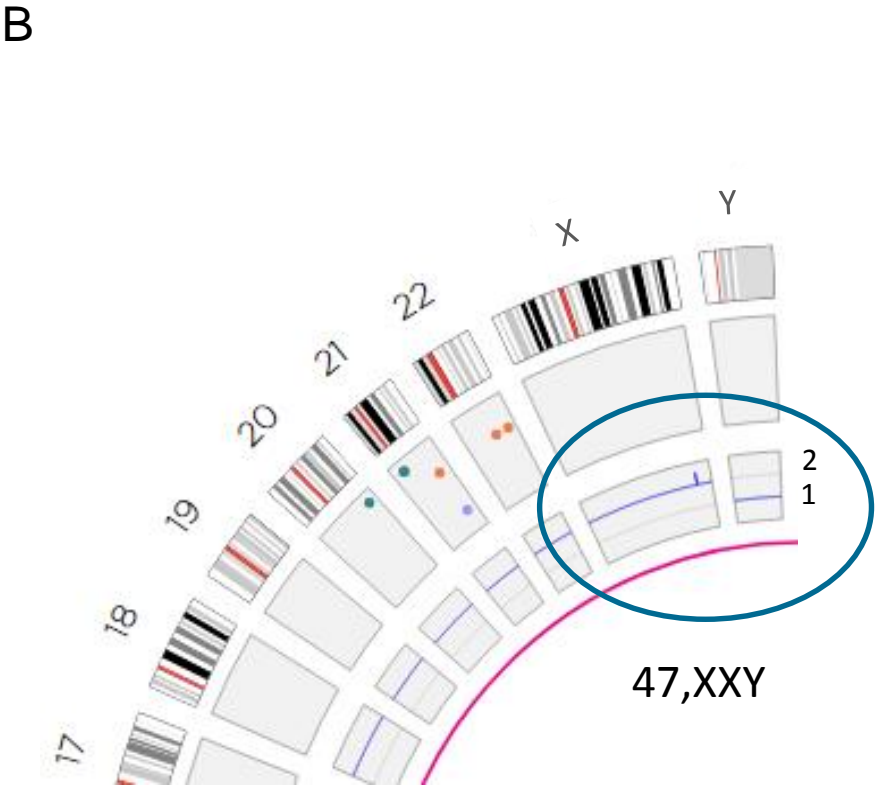

**Figure 4: Representation of different chromosomal aberrations**

**A**

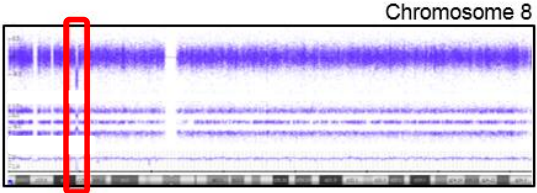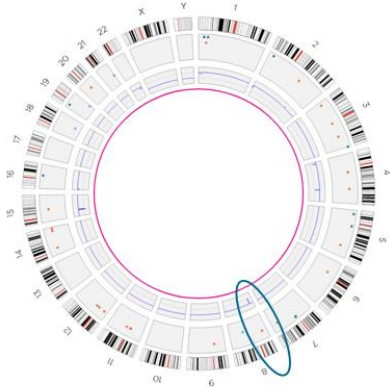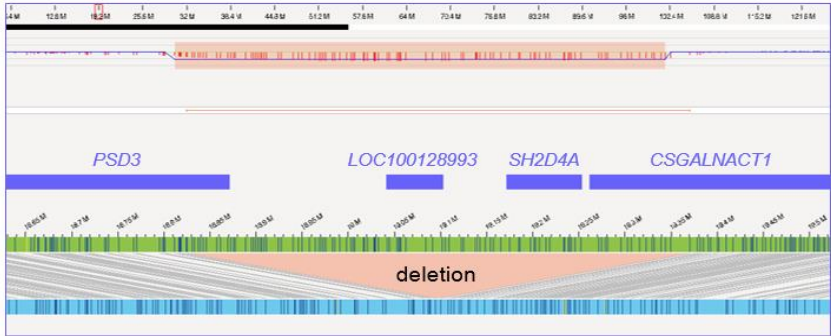

**B**

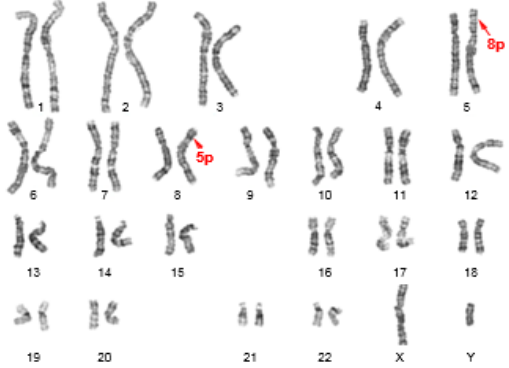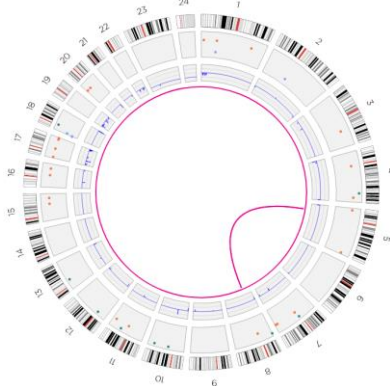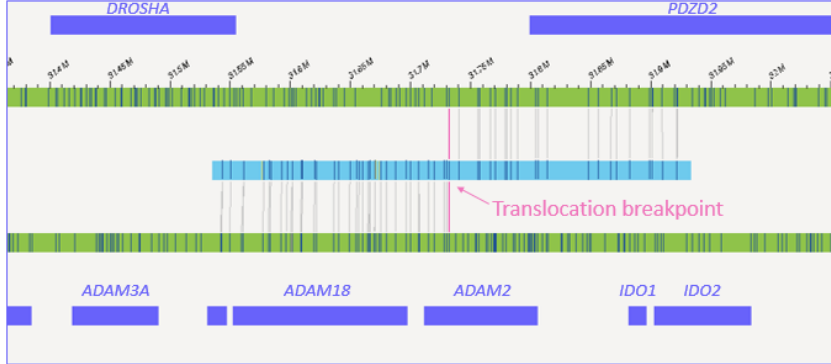

**C**

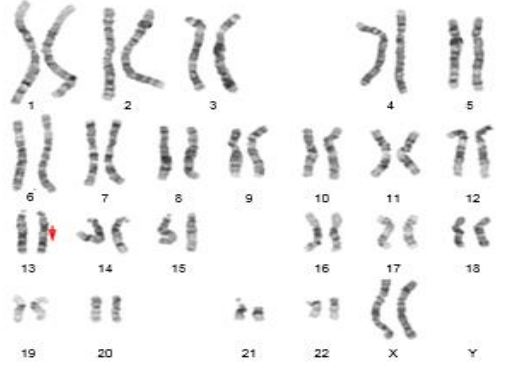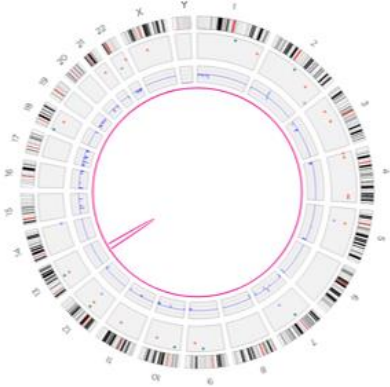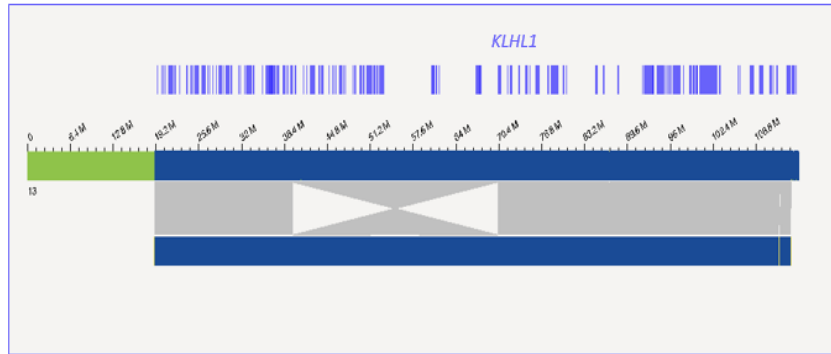

**Figure 5:** Isodicentric Y-chromosomes show specific bionano assembly map patterns

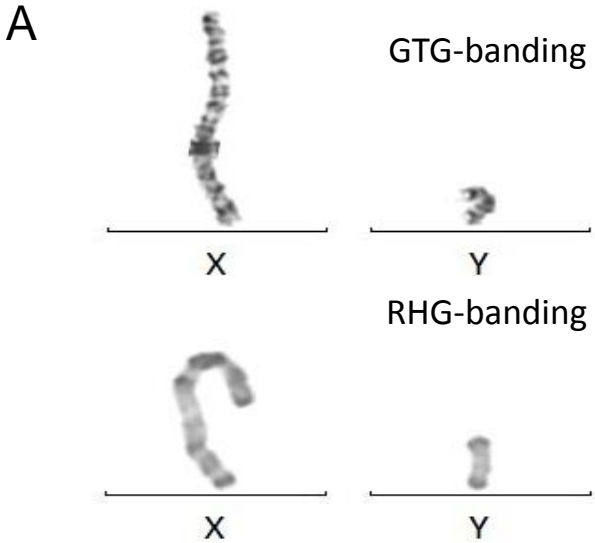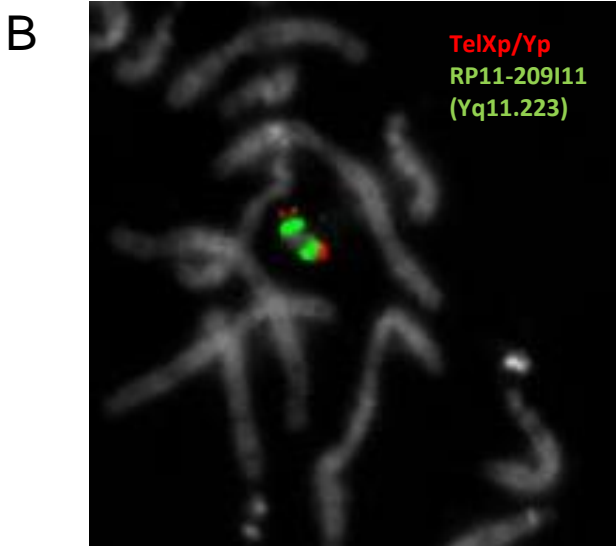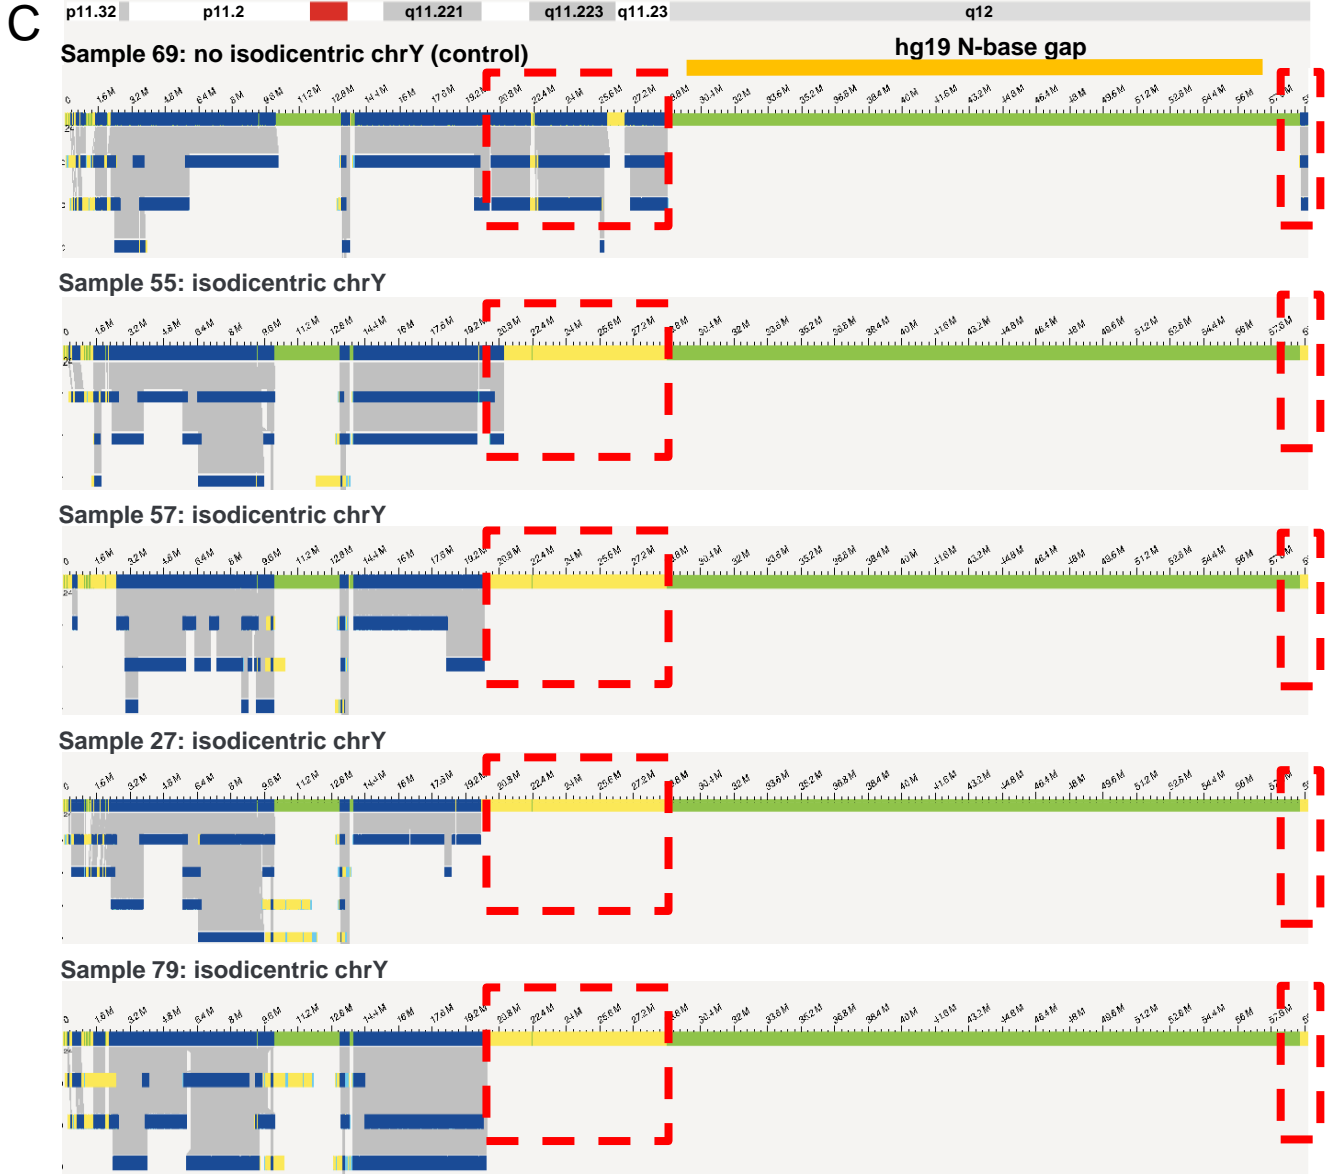

**Figure 6:** Small X ring chromosome

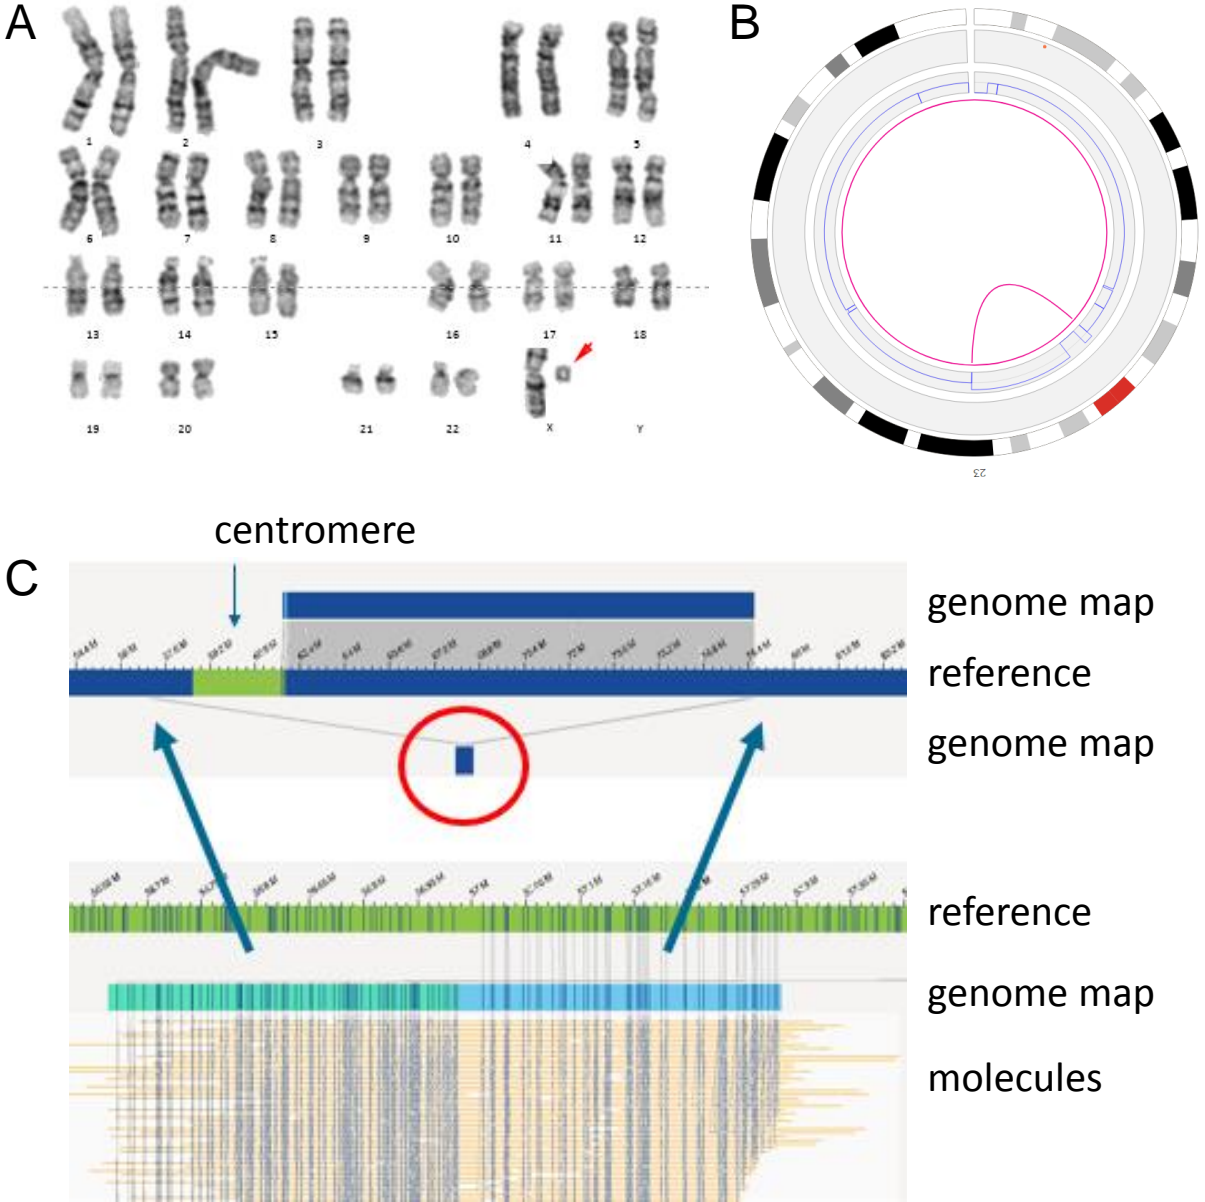

**Figure 7:** Examples of inversions and translocations interrupting well known disease causing genes

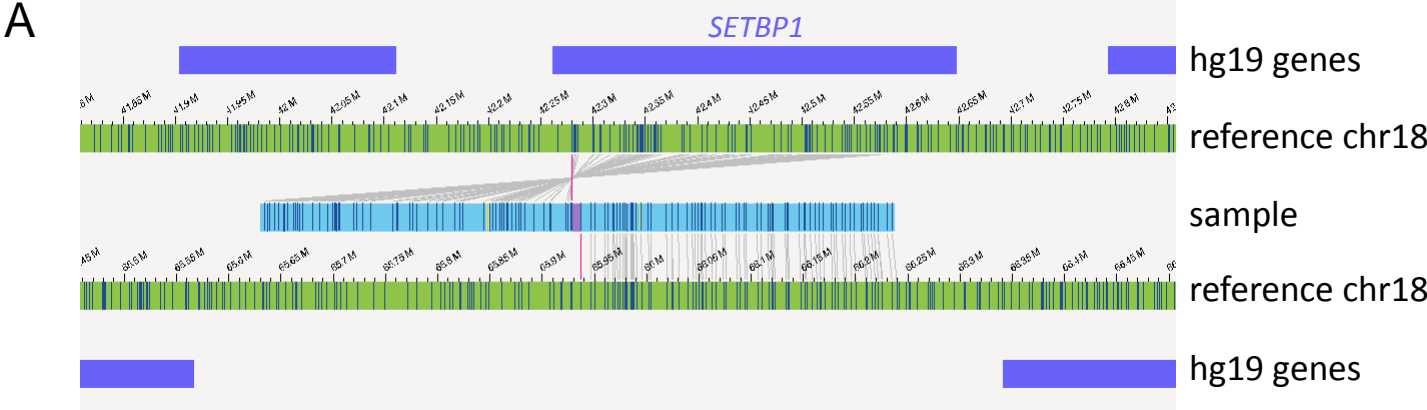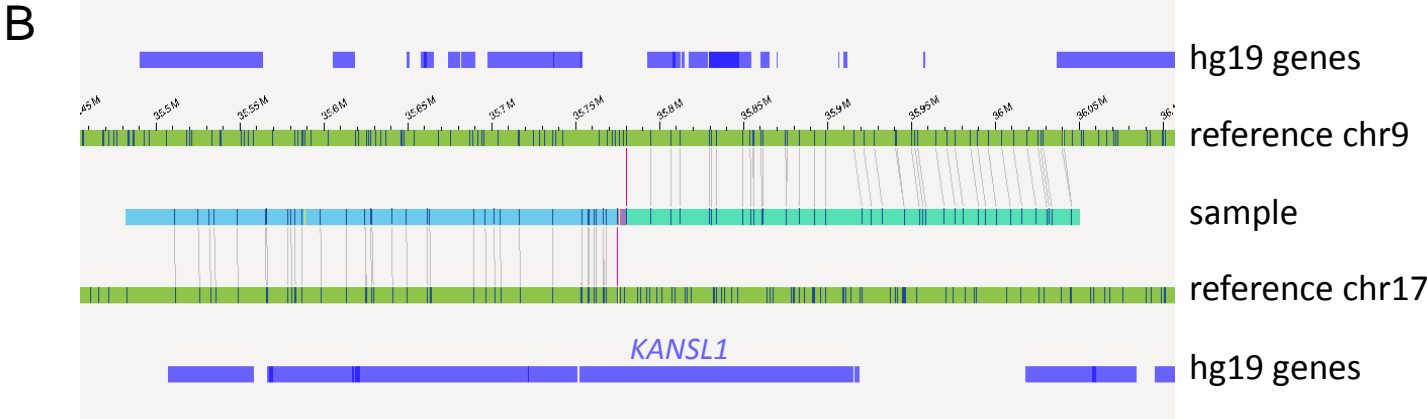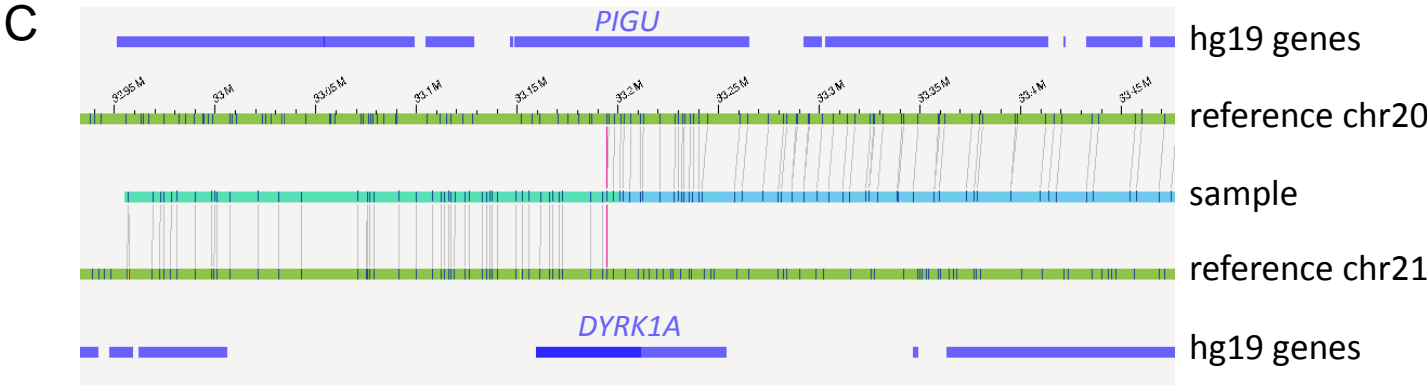



**Figure 8:** Example of a typical 22q11.2 microdeletion syndrome (VCF, Di-George syndrome)

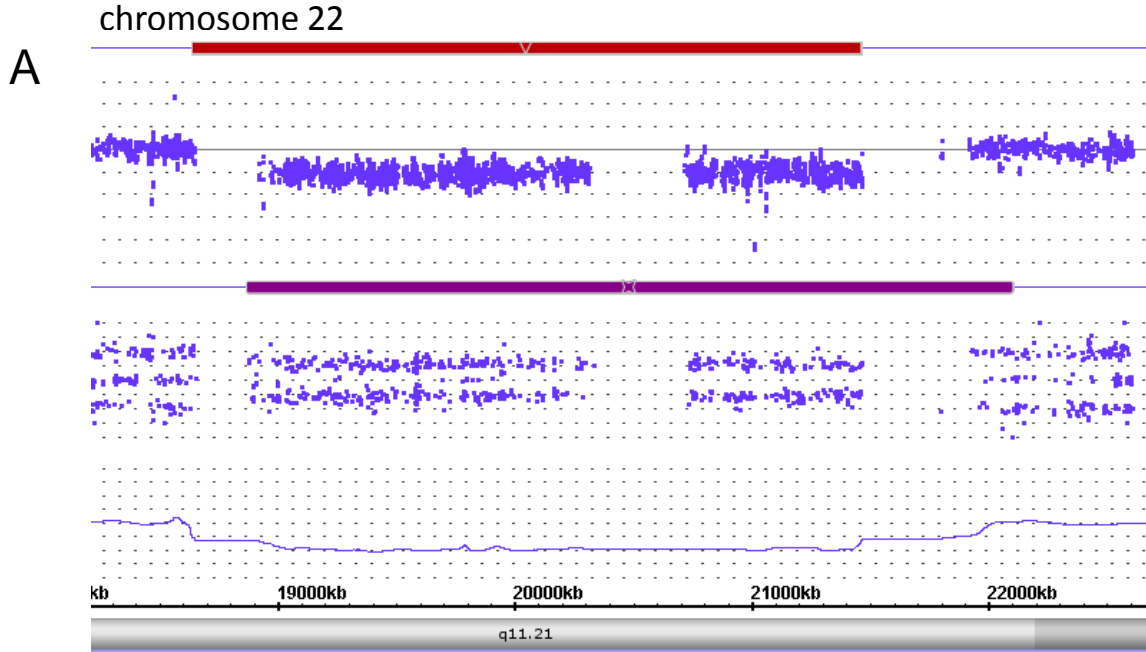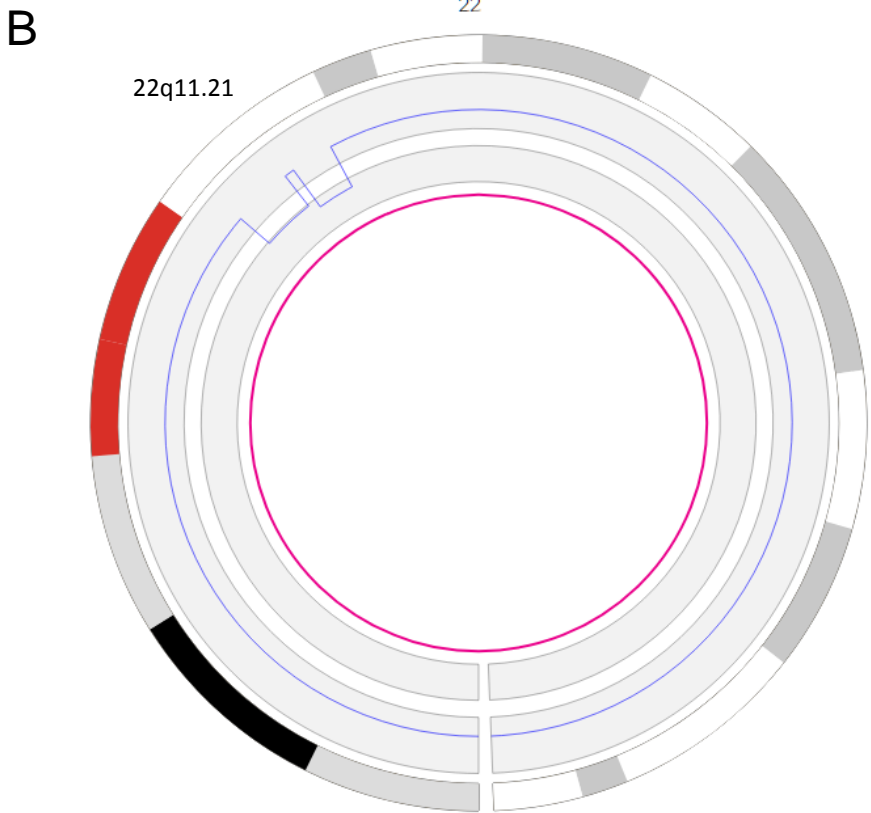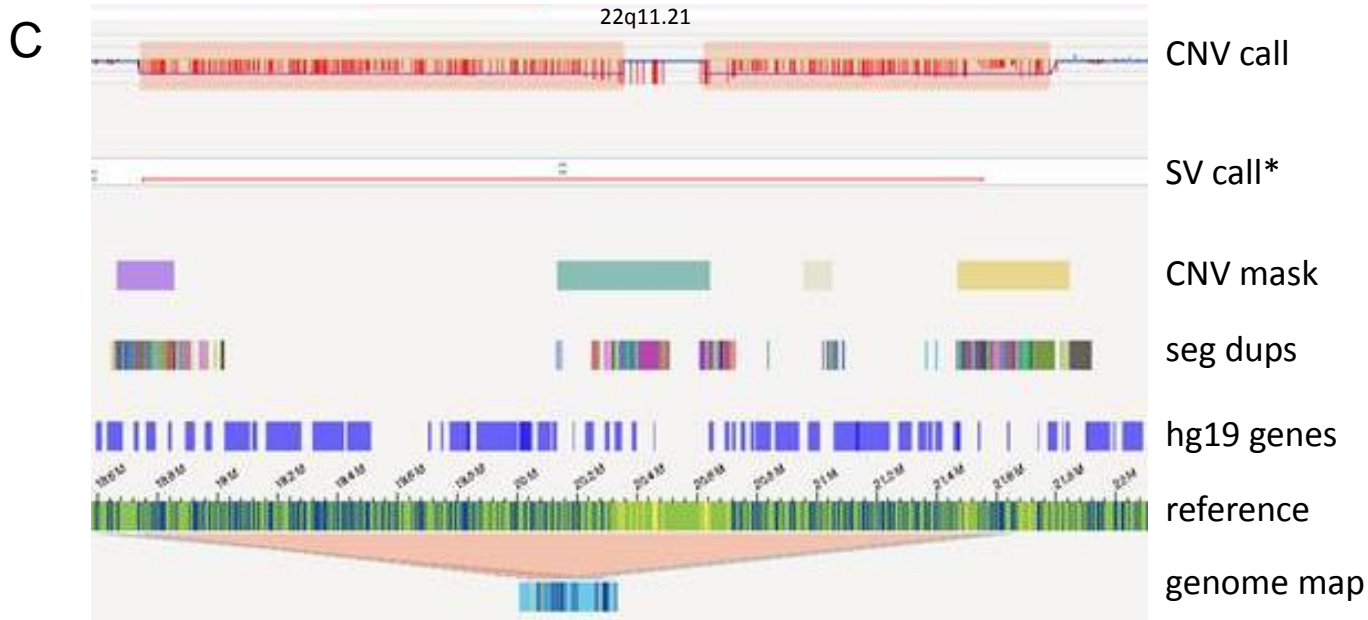



**Figure 9: Complex sample 28**

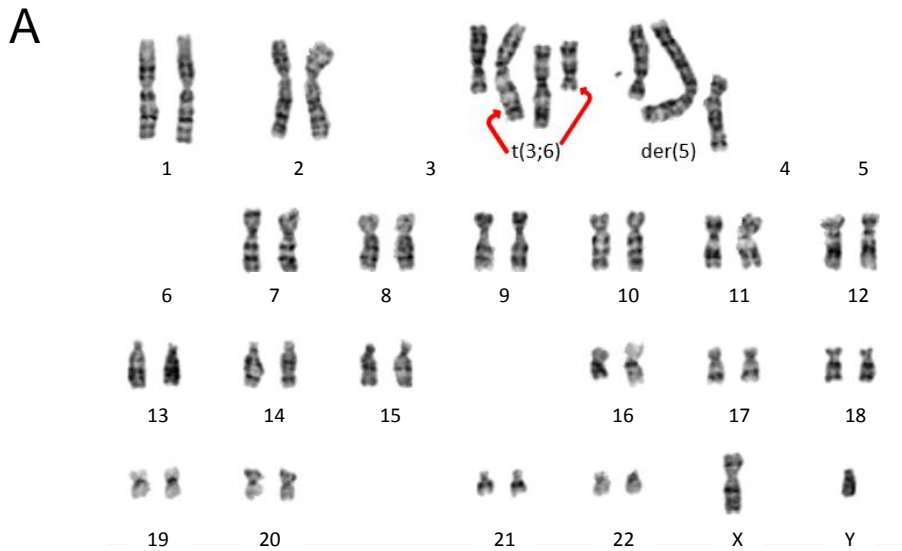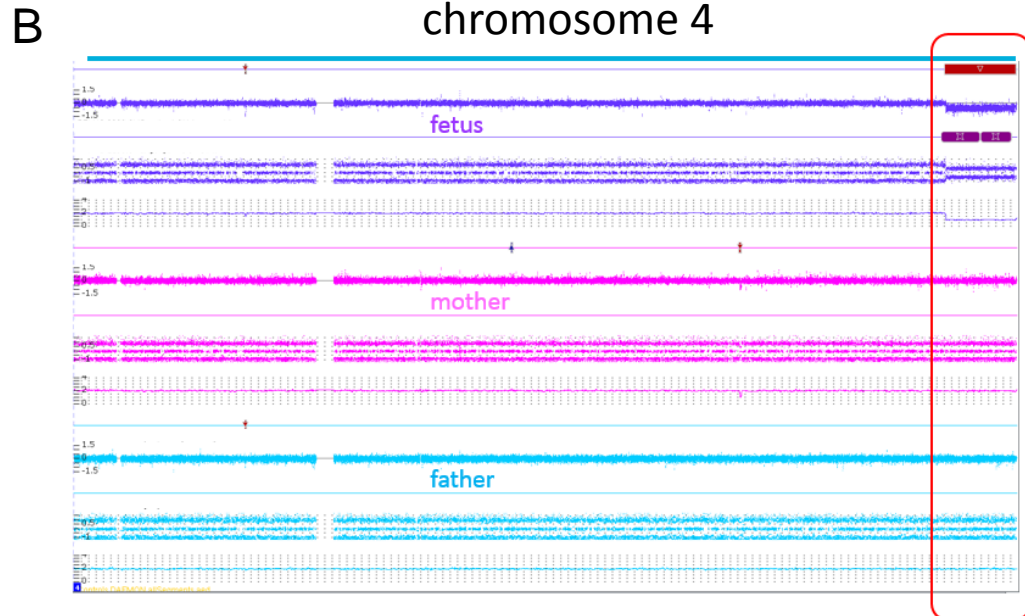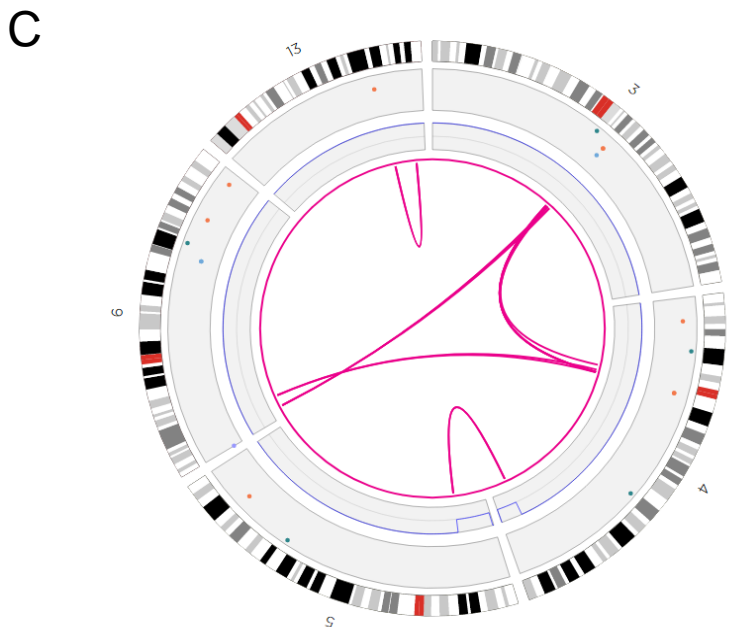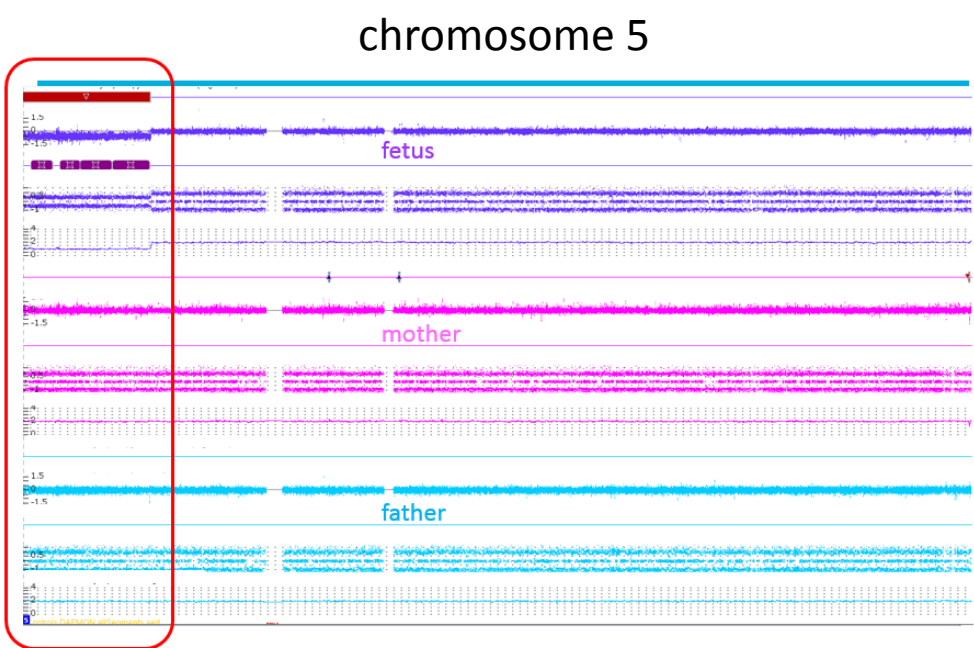

**Figure 10: Complex sample 66**

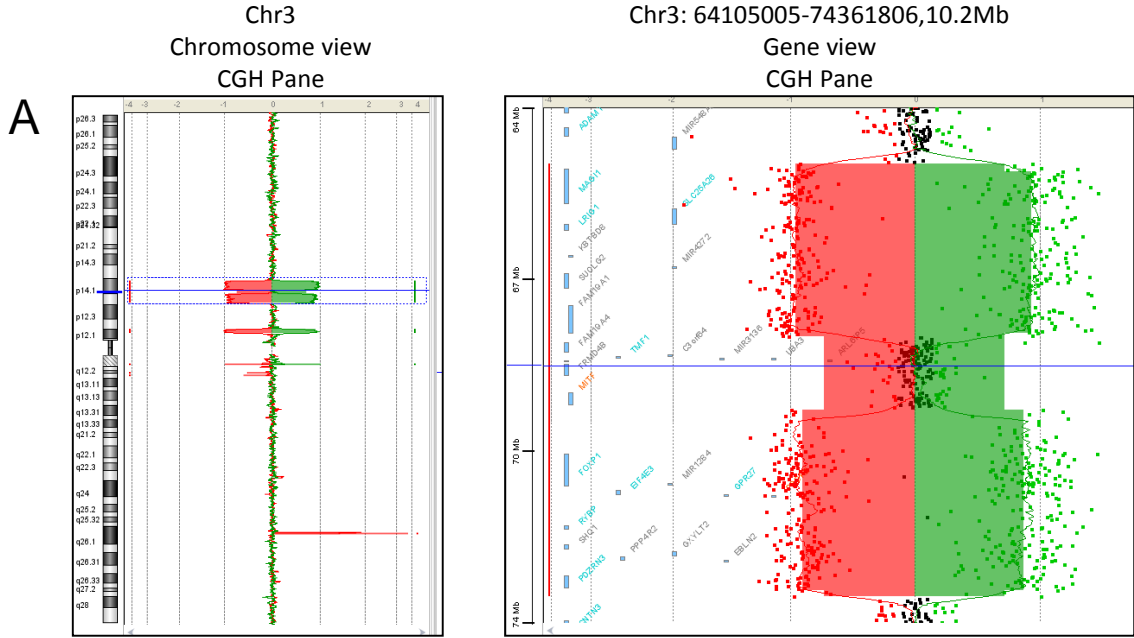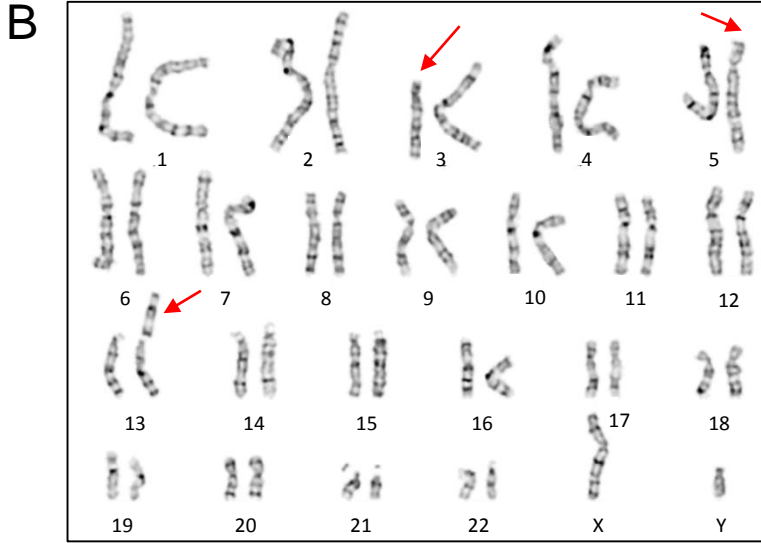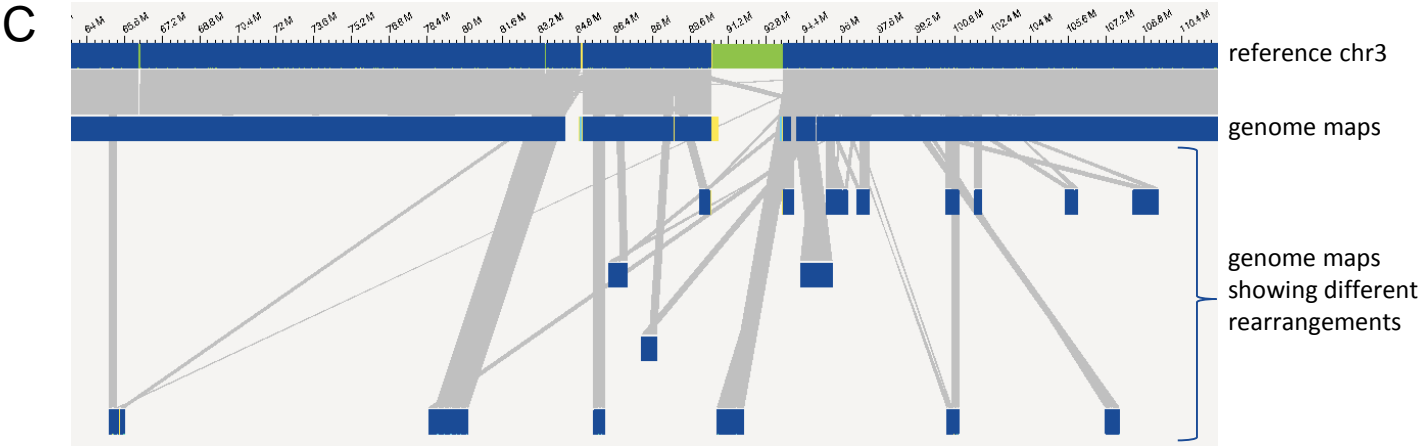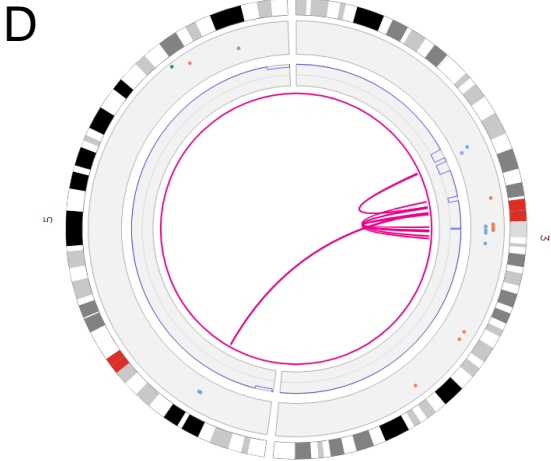

Source: https://www.biorxiv.org/content/10.1101/2020.07.15.205245.full.pdf
